# Supplementary material for: Are adjunct treatments effective in improving pain and function when added to exercise therapy in people with patellofemoral pain? A systematic review with meta-analysis and appraisal of the quality of interventions
Source: HighWire-hosted journal article supplement (doi:10.1136/bjsports-2024-108145), 2024-06-18
Supplement: bjsports-2024-108145supp004_data_supplement.pdf [file bjsports-2024-108145supp004_data_supplement.pdf]

Table 1

Grading of Recommendations, Assessment, Development and Evaluations (GRADE) summary tables.

1a. Summary of GRADE upgrade and downgrade criteria.

|                                 | Risk of bias                                        | Inconsistency                   | Indirectness                                                                                                                                                                                                                                                                   | Imprecision                                   | Other considerations                                                                                                    |
|---------------------------------|-----------------------------------------------------|---------------------------------|--------------------------------------------------------------------------------------------------------------------------------------------------------------------------------------------------------------------------------------------------------------------------------|-----------------------------------------------|-------------------------------------------------------------------------------------------------------------------------|
| Serious downgrade (–1) if:      | Only included one study rated as low risk of bias   | Heterogeneity between 41 to 60% | Variation in one of either: <ul style="list-style-type: none"><li>- Outcome measures used</li><li>- Timepoints when outcome assessed</li><li>- Differences between interventions (adjunct treatment, exercise-therapy program and/or length of intervention)</li></ul>         | Size of confidence intervals between 0.5 to 1 | Publication bias strongly suspected if < 10 studies included, which is the minimum recommended for funnel plot analysis |
| Very serious downgrade (–2) if: | Did not include any study rated as low risk of bias | Heterogeneity > 60%             | Variation in two or more of either: <ul style="list-style-type: none"><li>- Outcome measures used</li><li>- Timepoints when outcome assessed</li><li>- Differences between interventions (adjunct treatment, exercise-therapy program and/or length of intervention)</li></ul> | Size of confidence intervals > 1              |                                                                                                                         |

|                  |                                         |      |      |      |                 |
|------------------|-----------------------------------------|------|------|------|-----------------|
| Upgrade (+1) if: | All studies<br>were low risk<br>of bias | N.A. | N.A. | N.A. | Effect size > 1 |
|------------------|-----------------------------------------|------|------|------|-----------------|

1b. Neuromuscular electrical stimulation combined with exercise therapy compared to exercise therapy alone for people with patellofemoral pain

| Certainty assessment  |                   |              |               |              |              |                                      | № of patients     |          | Effect                                            | Certainty        |
|-----------------------|-------------------|--------------|---------------|--------------|--------------|--------------------------------------|-------------------|----------|---------------------------------------------------|------------------|
| № of trials           | Trial design      | Risk of bias | Inconsistency | Indirectness | Imprecision  | Other considerations                 | Adjunct treatment | Exercise | Absolute (95% CI)                                 |                  |
| Pain – short term     |                   |              |               |              |              |                                      |                   |          |                                                   |                  |
| 5                     | randomised trials | very serious | N.A.          | very serious | serious      | publication bias strongly suspected  | 120               | 118      | SMD <b>0.27 lower</b> (0.53 lower to 0.02 lower)  | ⊕○○○<br>VERY LOW |
| Function – short term |                   |              |               |              |              |                                      |                   |          |                                                   |                  |
| 4                     | randomised trials | very serious | very serious  | very serious | very serious | publications bias strongly suspected | 81                | 73       | SMD <b>0.44 lower</b> (1.08 lower to 0.20 higher) | ⊕○○○<br>VERY LOW |

1c. Monopolar dielectric diathermy combined with exercise therapy compared to exercise therapy alone for people with patellofemoral pain

| Certainty assessment  |                   |              |               |              |              | № of patients                       |                   | Effect   | Certainty                                         |                   |
|-----------------------|-------------------|--------------|---------------|--------------|--------------|-------------------------------------|-------------------|----------|---------------------------------------------------|-------------------|
| № of trials           | Trial design      | Risk of bias | Inconsistency | Indirectness | Imprecision  | Other considerations                | Adjunct treatment | Exercise |                                                   | Absolute (95% CI) |
| Pain – short term     |                   |              |               |              |              |                                     |                   |          |                                                   |                   |
| 2                     | randomised trials | very serious | very serious  | serious      | very serious | publication bias strongly suspected | 71                | 69       | SMD <b>2.58 lower</b> (4.59 lower to 0.57 lower)  | ⊕○○○<br>VERY LOW  |
| Function – short term |                   |              |               |              |              |                                     |                   |          |                                                   |                   |
| 2                     | randomised trials | very serious | very serious  | serious      | very serious | publication bias strongly suspected | 71                | 69       | SMD <b>0.93 lower</b> (2.11 lower to 0.26 higher) | ⊕○○○<br>VERY LOW  |

1d. Knee taping combined with exercise therapy compared to exercise therapy alone for people with patellofemoral pain

| Certainty assessment  |                   |              |               |              |              | № of patients                       |                   | Effect   | Certainty                                          |                   |
|-----------------------|-------------------|--------------|---------------|--------------|--------------|-------------------------------------|-------------------|----------|----------------------------------------------------|-------------------|
| № of trials           | Trial design      | Risk of bias | Inconsistency | Indirectness | Imprecision  | Other considerations                | Adjunct treatment | Exercise |                                                    | Absolute (95% CI) |
| Pain – short term     |                   |              |               |              |              |                                     |                   |          |                                                    |                   |
| 8                     | randomised trials | very serious | N.A.          | very serious | very serious | publication bias strongly suspected | 125               | 151      | SMD <b>0.17 higher</b> (0.07 lower to 0.41 higher) | ⊕○○○<br>VERY LOW  |
| Function – short term |                   |              |               |              |              |                                     |                   |          |                                                    |                   |
| 8                     | randomised trials | very serious | N.A.          | very serious | serious      | publication bias strongly suspected | 125               | 150      | SMD <b>0.02 higher</b> (0.22 lower to 0.26 higher) | ⊕○○○<br>VERY LOW  |

1e. Whole-body vibration combined with exercise therapy compared to exercise therapy alone for people with patellofemoral pain

| Certainty assessment  |                   |              |               |              |              | № of patients                       |                   | Effect   | Certainty                                         |                   |
|-----------------------|-------------------|--------------|---------------|--------------|--------------|-------------------------------------|-------------------|----------|---------------------------------------------------|-------------------|
| № of trials           | Trial design      | Risk of bias | Inconsistency | Indirectness | Imprecision  | Other considerations                | Adjunct treatment | Exercise |                                                   | Absolute (95% CI) |
| Pain – short term     |                   |              |               |              |              |                                     |                   |          |                                                   |                   |
| 4                     | randomised trials | very serious | very serious  | very serious | very serious | publication bias strongly suspected | 73                | 71       | SMD <b>1.10 lower</b> (2.34 lower to 0.14 higher) | ⊕○○○<br>VERY LOW  |
| Function – short term |                   |              |               |              |              |                                     |                   |          |                                                   |                   |
| 3                     | randomised trials | very serious | N.A.          | serious      | N.A.         | publication bias strongly suspected | 61                | 59       | SMD <b>0.87 lower</b> (1.80 lower to 0.06 higher) | ⊕○○○<br>VERY LOW  |

1f. Knee brace combined with exercise therapy compared to exercise therapy alone for people with patellofemoral pain

| Certainty assessment  |                   |              |               |              |             | № of patients                       |                   | Effect   | Certainty                                         |                   |
|-----------------------|-------------------|--------------|---------------|--------------|-------------|-------------------------------------|-------------------|----------|---------------------------------------------------|-------------------|
| № of trials           | Trial design      | Risk of bias | Inconsistency | Indirectness | Imprecision | Other considerations                | Adjunct treatment | Exercise |                                                   | Absolute (95% CI) |
| Function – short term |                   |              |               |              |             |                                     |                   |          |                                                   |                   |
| 2                     | randomised trials | very serious | very serious  | very serious |             | publication bias strongly suspected | 49                | 51       | SMD <b>0.18 lower</b> (1.48 lower to 1.13 higher) | ⊕○○○<br>VERY LOW  |

1g. Electromyographic biofeedback combined with exercise therapy compared to exercise therapy alone for people with patellofemoral pain

| Certainty assessment |                   |              |               |              |             | № of patients                       |                   | Effect   | Certainty                                          |                   |
|----------------------|-------------------|--------------|---------------|--------------|-------------|-------------------------------------|-------------------|----------|----------------------------------------------------|-------------------|
| № of trials          | Trial design      | Risk of bias | Inconsistency | Indirectness | Imprecision | Other considerations                | Adjunct treatment | Exercise |                                                    | Absolute (95% CI) |
| Pain – short term    |                   |              |               |              |             |                                     |                   |          |                                                    |                   |
| 2                    | randomised trials | very serious | N.A.          | very serious | serious     | publication bias strongly suspected | 43                | 43       | SMD <b>0.34 higher</b> (0.08 lower to 0.77 higher) | ⊕○○○<br>VERY LOW  |
