# Supplementary material for: Are adjunct treatments effective in improving pain and function when added to exercise therapy in people with patellofemoral pain? A systematic review with meta-analysis and appraisal of the quality of interventions
Source: HighWire-hosted journal article supplement (doi:10.1136/bjsports-2024-108145), 2024-06-18
Supplement: bjsports-2024-108145supp008_data_supplement.pdf [file bjsports-2024-108145supp008_data_supplement.pdf]

Table 1

Template for Intervention Description and Replication (TIDieR) table of interventions for included trials.

1a. TIDieR table of interventions for included trials that have biophysical agents as adjunct treatment

| Trial<br>Year, author  | Intervention<br>type                       | Provider | How          | Where | When and<br>how much             | Tailoring                                                                                                     | How well | What                                                                                                                                                                                                                                                                            |
|------------------------|--------------------------------------------|----------|--------------|-------|----------------------------------|---------------------------------------------------------------------------------------------------------------|----------|---------------------------------------------------------------------------------------------------------------------------------------------------------------------------------------------------------------------------------------------------------------------------------|
| Jing et al.[1]<br>2024 | Exercise                                   | NR       | NR           | NR    | 3 times a<br>week for 6<br>weeks | The load<br>intensity<br>during<br>training is set<br>at 70% of the<br>1RM,<br>adjusted<br>every two<br>weeks | NR       | Strengthening<br>exercises of<br>quadriceps, gluteus<br>maximus and gluteus<br>medius including<br>static hip bridges,<br>wall squats, barbell<br>hip thrusts, clamshell<br>exercises, ball knee<br>extensions, split<br>squats and quadriceps<br>resistance knee<br>extensions |
|                        | Neuromuscular<br>electrical<br>stimulation | NR       | Face-to-face | NR    | 3 times a<br>week for 6<br>weeks | The<br>stimulation<br>intensity is<br>adjusted<br>every two<br>weeks to<br>maximise                           | NR       | NMES was applied<br>on the affected side's<br>VM superimposed<br>during muscle<br>contraction to<br>activate and<br>strengthen the VM                                                                                                                                           |

|                                 |                                |                    |              |    |                          |                                                                     |                                                                                                                                      |                                                                                                                                                                                                                                                          |
|---------------------------------|--------------------------------|--------------------|--------------|----|--------------------------|---------------------------------------------------------------------|--------------------------------------------------------------------------------------------------------------------------------------|----------------------------------------------------------------------------------------------------------------------------------------------------------------------------------------------------------------------------------------------------------|
|                                 |                                |                    |              |    |                          | motor unit recruitment                                              | The electrical stimulation waveform is square, with a pulse width of 400µs, a frequency of 50 Hz, and a current control below 100 mA |                                                                                                                                                                                                                                                          |
| Albornoz-Cabello et al.[2] 2023 | Exercise                       | Physical therapist | Face-to-face | NR | Daily over 3 weeks       | The progression was performed according to the patient's sensations | NR                                                                                                                                   | Exercise protocol for knee stability consisting of squats for concentric and eccentric strengthening of quadriceps, side step, bridge exercise for hamstrings, clam exercise for gluteus medius, soleus stretch standing, gastrocnemius stretch standing |
|                                 | Monopolar dielectric diathermy | Physical therapist | Face-to-face | NR | 10 sessions over 3 weeks | NR                                                                  | NR                                                                                                                                   | 12 minutes of monopolar dielectric diathermy by                                                                                                                                                                                                          |

Souto LR, et al. *Br J Sports Med* 2024;0:1–13. doi: 10.1136/bjsports-2024-108145

|                       |                          |    |    |    |                                                   |    |    |                                                                                                                                                                                                                                          |
|-----------------------|--------------------------|----|----|----|---------------------------------------------------|----|----|------------------------------------------------------------------------------------------------------------------------------------------------------------------------------------------------------------------------------------------|
|                       |                          |    |    |    |                                                   |    |    | A biphasic pulsed current was used<br>Frequency (Hz) is the number of pulses in one second (20-50 pulses per second)                                                                                                                     |
| Qayyum et al.[4] 2022 | Exercise                 | NR | NR | NR | 4 sessions per week for 4 weeks                   | NR | NR | Stretching exercises of quadriceps, ITB and calf muscles<br><br>Quadriceps Strengthening, straight leg raises, hip Abduction and adduction exercises<br><br>Hamstrings strengthening, dumbbell squats and wall squats were also included |
|                       | High power laser therapy | NR | NR | NR | 8 consecutive sessions with an interval of 3 days | NR | NR | Participants were exposed to 120 seconds of 10W-laser with 120J/cm2 per therapy                                                                                                                                                          |
|                       |                          |    |    |    |                                                   |    |    |                                                                                                                                                                                                                                          |

|                          |                                                |    |              |            |                                 |                                                                                             |    |                                                                                                                                                                                                                                                                                                           |
|--------------------------|------------------------------------------------|----|--------------|------------|---------------------------------|---------------------------------------------------------------------------------------------|----|-----------------------------------------------------------------------------------------------------------------------------------------------------------------------------------------------------------------------------------------------------------------------------------------------------------|
| Rodrigues et al.[5] 2022 | Exercise                                       | NR | Face-to-face | Laboratory | 12 sessions, 2-3 times per week | The load of the 10RM test was re-evaluated 30 minutes before the fourth and eighth sessions | NR | The training protocol consisted of bilateral knee extension exercise in a seated leg extension machine at 60% of 10RM                                                                                                                                                                                     |
|                          | Anodal Transcranial direct current stimulation | NR | Face-to-face | Laboratory | 12 sessions, 2-3 times per week | NR                                                                                          | NR | <p>The anodic electrode was applied to the primary motor cortex bilaterally, located under the Cz electrode area, according to the international 10–20 EEG system.</p> <p>The reference electrode was placed on the orbitofrontal cortex contralaterally to the dominant leg of each subject, located</p> |

|                                    |                                |                 |               |                |                          |    |    |                                                                                                                                                                                                                                                           |
|------------------------------------|--------------------------------|-----------------|---------------|----------------|--------------------------|----|----|-----------------------------------------------------------------------------------------------------------------------------------------------------------------------------------------------------------------------------------------------------------|
|                                    |                                |                 |               |                |                          |    |    | under the electrode area Fp1 or Fp2                                                                                                                                                                                                                       |
| Albornoz-Cabello et al.[6]<br>2020 | Exercise                       | NR              | Home sessions | Patient’s home | Daily over 3 weeks       | NR | NR | The treatment consisted of home/gym prescription exercises including stretching exercises of hip muscles and static bike                                                                                                                                  |
|                                    | Monopolar dielectric diathermy | Physiotherapist | Face-to-face  | NR             | 10 sessions over 3 weeks | NR | NR | Participants received monopolar dielectric diathermy by emission of radiofrequency treatment with a pulsed emission of 840 kHz and 30 V in dynamic application, with a continuous rotation and translational movement on the anterior surface of the knee |

|                         |                                                            |                 |                                      |                             |                                      |    |    |                                                                                                                                                                                                                                                                                                                        |
|-------------------------|------------------------------------------------------------|-----------------|--------------------------------------|-----------------------------|--------------------------------------|----|----|------------------------------------------------------------------------------------------------------------------------------------------------------------------------------------------------------------------------------------------------------------------------------------------------------------------------|
| Celik et al.[7]<br>2020 | Exercise                                                   | Physiotherapist | Face-to-face<br>and home<br>sessions | NR and<br>patient’s<br>home | 3 sessions a<br>week, for 6<br>weeks | NR | NR | Knee and hip<br>strengthening<br>exercises consisting<br>of isometric<br>quadriceps<br>strengthening,<br>terminal knee<br>extension, straight leg<br>raise (with 10° hip<br>external rotation),<br>mini-squat (30° with<br>soft ball), hip<br>abduction, side-lying<br>clam exercise,<br>hamstring and calf<br>stretch |
|                         | Superimposed<br>neuromuscular<br>electrical<br>stimulation | Physiotherapist | Face-to-face                         | NR                          | 3 sessions a<br>week, for 6<br>weeks | NR | NR | NMES (stimulation<br>frequency of 50 Hz<br>and biphasic<br>symmetrical square<br>pulses lasting up to<br>400µs with an on-off<br>ratio of 10:20<br>seconds and ramp up<br>and ramp-down times<br>of 1 second)<br>superimposed on<br>voluntary contraction                                                              |

|                          |                                      |    |                      |                       |                   |                                                                           |                                                                                                                                   |                                                                                                                                                                                                                                          |
|--------------------------|--------------------------------------|----|----------------------|-----------------------|-------------------|---------------------------------------------------------------------------|-----------------------------------------------------------------------------------------------------------------------------------|------------------------------------------------------------------------------------------------------------------------------------------------------------------------------------------------------------------------------------------|
|                          |                                      |    |                      |                       |                   |                                                                           |                                                                                                                                   | was applied during two different exercises. 1) Isometric quadriceps strengthening (30 isometric contractions). 2) 0–30° terminal knee extension (30 isotonic contractions)                                                               |
| Talbot et al.[8]<br>2020 | Exercise                             | NR | Home sessions        | Patient’s home        | Daily for 9 weeks | Participants were trained according to their MVC                          | Weekly communication via email, text, or phone encouraged compliance with the protocol                                            | Straight leg raises, quad sets, step-ups, and squats exercises                                                                                                                                                                           |
|                          | Neuromuscular electrical stimulation | NR | NR and Home sessions | NR and Patient’s home | Daily for 9 weeks | Adjustments to stimulation contraction intensity were made at each visit. | Staff contacted participants weekly by telephone, email, or text messages to record reported pain levels and treatment compliance | The stimulus was applied over the quadriceps. It was used a symmetrical square biphasic wave form waveform with output current that ranged from 0 to 70 mA. Parameters were set at variable pulse duration of 300 to 400µs; ramp time of |



|                         |                                                |              |              |            |                                |                                                                                                                                                                           |                                                                                                            |                                                                                                                                                                                                         |
|-------------------------|------------------------------------------------|--------------|--------------|------------|--------------------------------|---------------------------------------------------------------------------------------------------------------------------------------------------------------------------|------------------------------------------------------------------------------------------------------------|---------------------------------------------------------------------------------------------------------------------------------------------------------------------------------------------------------|
|                         |                                                |              |              |            |                                |                                                                                                                                                                           |                                                                                                            | 1.0:0.50 s; frequency of 50 Hz; and duty cycle of 5 s-on/10s-off                                                                                                                                        |
| Glaviano et al.[9] 2019 | Exercise                                       | Certified AT | Face-to-face | Laboratory | 3 sessions a week, for 4 weeks | Exercises were individualized considering the individual impairments for ROM, patellar mobility and foot pronation and the maximal strength measure collected at baseline | Rehabilitation compliance was monitored 3 times per week during the sessions and recorded by the clinician | Strengthening exercises and balance training were completed throughout the study, whereas functional retraining tasks were introduced on the seventh visit and performed for the remainder of the study |
|                         | Patterned electrical neuromuscular stimulation | Certified AT | Face-to-face | Laboratory | 3 sessions a week, for 4 weeks | NR                                                                                                                                                                        | Rehabilitation compliance was monitored 3 times per week during the sessions and                           | The device uses a 50-Hz pulse frequency, 70-ls phase duration, and 200-millisecond stimulus train with an asymmetric biphasic                                                                           |

|                       |          |    |    |    |                     |    |                                                                                                                                                                      |                                                                                                                                                                                                               |
|-----------------------|----------|----|----|----|---------------------|----|----------------------------------------------------------------------------------------------------------------------------------------------------------------------|---------------------------------------------------------------------------------------------------------------------------------------------------------------------------------------------------------------|
|                       |          |    |    |    |                     |    | recorded by the clinician                                                                                                                                            | square-waved stimulus. Alternating rhythmic contractions were generated using 2 stimulation patterns to target the agonist muscles (VMO and gluteus medius) and antagonist muscles (hamstrings and adductors) |
| Nouri et al.[10] 2019 | Exercise | NR | NR | NR | Daily over 3 months | NR | Patients were regularly contacted by the PM&R specialist in order to ensure their compliance with the exercise therapy program and check for potential complications | Quadriceps muscle strengthening program included isometric knee exercise and straight leg raising                                                                                                             |

|                            |                               |                 |               |                |                                                     |                                                         |                                                                                                                                                |                                                                                                                                                                                                                               |
|----------------------------|-------------------------------|-----------------|---------------|----------------|-----------------------------------------------------|---------------------------------------------------------|------------------------------------------------------------------------------------------------------------------------------------------------|-------------------------------------------------------------------------------------------------------------------------------------------------------------------------------------------------------------------------------|
|                            | High-power laser              | PM&R specialist | Face-to-face  | NR             | 5 consecutive sessions, separated by 2-day interval | NR                                                      | NR                                                                                                                                             | Pain Relief program (with 10 W and 120 J/cm2) for 120 seconds were exploited per therapy session                                                                                                                              |
| Iammarrone et al.[11] 2016 | Exercise                      | Therapist       | Home sessions | Patient's home | Daily for 6 weeks                                   | Load increase was guided by pain reaction upon exertion | To enhance compliance, Patients received a tutorial with photographs, a text explaining exercises and a diary to register amount of exercising | Static and dynamic muscular exercises for quadriceps, adductor, and gluteal muscles. It also included balance and stretching exercises to loosen tight structures like hamstrings, iliotibial tract and patellar retinaculum. |
|                            | Pulsed electromagnetic fields | Therapist       | Home sessions | Patient's home | 4h per day for 6 weeks                              | NR                                                      | The stimulator had a timer to record the hours of therapy, allowing patient compliance to be monitored                                         | The battery-operated device produced a pulsed signal with a square waveform, a peak magnetic field intensity of 1.5 mT, an active pulse duration of 1.3 ms with a frequency of 75 Hz and a duty-cycle of 10%                  |

|                          |                             |                    |               |    |                          |                                                                                                          |                                                                             |                                                                                                                                                                                                                                                                                                        |
|--------------------------|-----------------------------|--------------------|---------------|----|--------------------------|----------------------------------------------------------------------------------------------------------|-----------------------------------------------------------------------------|--------------------------------------------------------------------------------------------------------------------------------------------------------------------------------------------------------------------------------------------------------------------------------------------------------|
| Bily et al.[12]<br>2008  | Exercise                    | Physical therapist | Face-to-face  | NR | Daily over 12 weeks      | The pain level was taken into consideration for load management                                          | Training protocols were controlled once a week for compliance               | Leg and toe raise exercises, exercise in standing position with a rubber tube, toe raises, balance exercise, and bicycling                                                                                                                                                                             |
|                          | Electric muscle stimulation | Physician          | Home sessions | NR | Daily over 12 weeks      | Pain tolerance and patient discomfort were taken into consideration for the intensity of the stimulation | Patients were asked to record each stimulation session to ensure compliance | Quadriceps stimulation<br>The EMS device is a 2-channel stimulator, which produces asymmetric biphasic pulses for a duration of .26ms. Maximal amplitude is 80mA, with maximal output of 50V at 500 Ω. The stimulation frequency was set at 40Hz, with a duty cycle of 5 seconds on and 10 seconds off |
| Akarcali et al.[13] 2002 | Exercise                    | NR                 | NR            | NR | 30 sessions over 6 weeks | The progression of load and exercises were individually                                                  | NR                                                                          | Isometric and eccentric quadriceps exercises                                                                                                                                                                                                                                                           |

|                                     |    |    |    |                            |                                                                                                                                 |                                                                                      |                                                                                                                                                                                                                                       |  |
|-------------------------------------|----|----|----|----------------------------|---------------------------------------------------------------------------------------------------------------------------------|--------------------------------------------------------------------------------------|---------------------------------------------------------------------------------------------------------------------------------------------------------------------------------------------------------------------------------------|--|
|                                     |    |    |    |                            |                                                                                                                                 | prescribed according to the level of perceived pain (pain level up to 5 was allowed) |                                                                                                                                                                                                                                       |  |
| High voltage electrical stimulation | NR | NR | NR | 5 times a week for 6 weeks | The intensity of stimulation was adjusted to a level which induced a contraction as close as to a maximum voluntary contraction | NR                                                                                   | High voltage pulsed galvanic stimulation with monophasic (twin-peak pulse) waveform and pulse duration of 65-75 µs was applied in the VMO. The intensity amplitude ranges from 1 to 100 c/s, with the pulse frequency of 60 c/s mode. |  |

*Abbreviation:* NR, not reported; NMES, neuromuscular electrical stimulation; AT, athletic trainer; ROM, range of motion; PM&R, physical medicine and rehabilitation; VL, vastus lateralis; VM, vastus medialis; IT, iliotibial, MVC, maximal voluntary contraction; VMO, vastus medialis oblique; RM, repetition maximum; EMS, electrical muscle stimulation; EEG, electroencephalogram

1b. TIDieR table of interventions for included trials that have taping as adjunct treatment

| Trial<br>Year, author    | Intervention<br>type | Provider              | How                                       | Where                                                 | When and<br>how much            | Tailoring                                         | How well                                                                                        | What                                                                                                                                                                                                                                                                                                                                                           |
|--------------------------|----------------------|-----------------------|-------------------------------------------|-------------------------------------------------------|---------------------------------|---------------------------------------------------|-------------------------------------------------------------------------------------------------|----------------------------------------------------------------------------------------------------------------------------------------------------------------------------------------------------------------------------------------------------------------------------------------------------------------------------------------------------------------|
| Lee et al.[14]<br>2023   | Exercise             | Physical<br>therapist | Face-to-<br>face and<br>home<br>exercises | Sports<br>medicine<br>centre and<br>patient’s<br>home | Twice a day<br>for one<br>month | Exercise was<br>performed in a<br>pain free range | Compliance to the<br>home exercise<br>therapy was<br>monitored by<br>the physical<br>therapists | Open kinetic-chain<br>exercises, including multi-<br>directional straight leg raise<br>and knee extension with<br>knee adduction<br><br>Closed kinetic-chain<br>exercises, including wall<br>squat exercise with knee<br>adduction and single-leg<br>squat exercise in 50° below<br><br>The hip and core muscle<br>strengthening regimen was<br>also performed |
|                          | Kinesio<br>Taping    | NR                    | Face-to-<br>face and<br>home<br>sessions  | Sports<br>medicine<br>centre and<br>patient’s<br>home | Daily for<br>one month          | NR                                                | NR                                                                                              | The taping was wrapped<br>around the patella along the<br>quadriceps tendon and<br>muscle to protect and<br>stabilise the patella                                                                                                                                                                                                                              |
| Şahan et<br>al.[15] 2023 | Exercise             | Physiotherapist       | Face-to-<br>face                          | Patient’s<br>home                                     | 6 weeks                         | NR                                                | NR                                                                                              | Stretching exercises of<br>hamstring, gastrosoleus,<br>TFL, and lumbar extensors<br>Knee stabilisation, and<br>strengthening exercises of<br>quadriceps, glutaesus<br>maximus, medius, and                                                                                                                                                                     |

|                        |             |                 |                                |                                                                  |                                                         |    |    |                                                                                                                                                                                                                                                                                                                                                                            |
|------------------------|-------------|-----------------|--------------------------------|------------------------------------------------------------------|---------------------------------------------------------|----|----|----------------------------------------------------------------------------------------------------------------------------------------------------------------------------------------------------------------------------------------------------------------------------------------------------------------------------------------------------------------------------|
|                        |             |                 |                                |                                                                  |                                                         |    |    | VMO                                                                                                                                                                                                                                                                                                                                                                        |
|                        | Star Taping | Physiotherapist | Face-to-face                   | Orthopaedics and Traumatology Department of Kırıkkale University | 6 weeks                                                 | NR | NR | Patellar star technique<br>This method permits four-way stabilisation. First band is applied from the tibia to the femur to stabilise the downward and upward displacement of the patella. Second, a band is applied in mediolateral direction for stabilisation in this direction. Then, two other cross bands are applied against valgus and varus stress, respectively. |
| Songur et al.[16] 2023 | Exercise    | NR              | Face-to-face and home sessions | NR and patient's home                                            | Daily over 6 weeks (2 sessions per week was supervised) | NR | NR | Stretching and mobilisation exercises for the knee and hip regions, progressive strengthening exercises (knee extensions and hip abduction-external rotations), balance exercises, core exercises, and a walking and running program.                                                                                                                                      |

|                        |          |                 |                |                |                              |                                                                            |                                                                                                            |                                                                                                                                                                                                                                                                                                                                                                                                                                                                                                                                                                        |
|------------------------|----------|-----------------|----------------|----------------|------------------------------|----------------------------------------------------------------------------|------------------------------------------------------------------------------------------------------------|------------------------------------------------------------------------------------------------------------------------------------------------------------------------------------------------------------------------------------------------------------------------------------------------------------------------------------------------------------------------------------------------------------------------------------------------------------------------------------------------------------------------------------------------------------------------|
|                        | Taping   | NR              | Face-to-face   | NR             | 12 applications over 6 weeks | NR                                                                         | NR                                                                                                         | <p>The McConnell patellar technique hypoallergenic tape was applied transversely to the anterior knee area. Then, athletic tape was applied, starting on the lateral edge of the patella. After pulling and tilting in the medial direction over the patella, it was terminated on the medial femoral condyle</p> <p>The femoral rotational taping technique hypoallergenic tape was applied to the area to be taped. Then, athletic tape was applied over the VMO. It was pulled diagonally outward from the front of the thigh and ended on the trochanter major</p> |
| Basbug et al.[17] 2022 | Exercise | Physiotherapist | Home exercises | Patient's home | 12 weeks                     | For the resistance exercises, the Thera-band® length was adjusted relative | The researcher physiotherapist saw the patients every week and carried out exercise compliance and control | Progressive neuromuscular exercise program that included a stabilisation of the knee and hip joint                                                                                                                                                                                                                                                                                                                                                                                                                                                                     |



|                          |                |                 |                       |        |                                      |    |    |                                                                                                                                                                                                                                                                     |
|--------------------------|----------------|-----------------|-----------------------|--------|--------------------------------------|----|----|---------------------------------------------------------------------------------------------------------------------------------------------------------------------------------------------------------------------------------------------------------------------|
|                          |                |                 |                       |        |                                      |    |    | to the Omni Scale                                                                                                                                                                                                                                                   |
|                          | Taping         | NR              | Face-to-face sessions | NR     | 6 face-to-face sessions over 6 weeks | NR | NR | Knee: ‘I’ taping for accurate positioning of the tissue was applied to neutralise the patellofemoral joint<br><br>Foot: correction taping to neutralise the subtalar joint by elevating the midtarsal joint and medial arch was applied                             |
| Arrebola et al.[18] 2020 | Exercise       | Physiotherapist | Face-to-face sessions | Clinic | Twice a week over 12 weeks           | NR | NR | Hip and quadriceps strengthening exercises and motor control exercises                                                                                                                                                                                              |
|                          | Kinesio taping | Physiotherapist | Face-to-face sessions | Clinic | Once a week over 12 weeks            | NR | NR | Patellar medialisation group: The therapeutic zone had a tension of >50% involving the entire lateral region of the patella<br><br>Lateral rotation of femur and tibia group: The therapeutic zone was in a spiral format throughout the extension of the patients' |

|                              |                           |                   |                       |        |                            |    |    |                                                                                                                                                 |
|------------------------------|---------------------------|-------------------|-----------------------|--------|----------------------------|----|----|-------------------------------------------------------------------------------------------------------------------------------------------------|
|                              |                           |                   |                       |        |                            |    |    | lower limbs with tension of <50%. The tape involved the greater trochanter, the medial femoral condyle, and the lateral region of the leg       |
| Ghourbanpour et al.[19] 2018 | Exercise                  | NR                | NR                    | NR     | 12 sessions during 4 weeks | NR | NR | Strengthening exercises for quadriceps muscles with emphasis on VMO, closed chain exercises, stretching exercises for hamstring muscles and ITB |
|                              | McConnell Patellar Taping | NR                | Face-to-face          | NR     | 12 sessions during 4 weeks | NR | NR | McConnell's method                                                                                                                              |
| Günay et al.[20] 2017        | Exercise                  | Physiotherapist   | Face-to-face sessions | Clinic | Twice a week over 6 weeks  | NR | NR | Stretching exercise of quadriceps, hamstring, gastrocnemius and ITB and strengthening of quadriceps, gluteus medius                             |
|                              | Kinesio Taping            | Taping specialist | Face-to-face sessions | Clinic | Twice a week over 6 weeks  | NR | NR | Kinesio taping was applied with VMO facilitation and patellar functional correction                                                             |

|                       |                |    |               |                |                                                                   |                       |    |                                                                                                                                                                                                                                                                                                                                         |
|-----------------------|----------------|----|---------------|----------------|-------------------------------------------------------------------|-----------------------|----|-----------------------------------------------------------------------------------------------------------------------------------------------------------------------------------------------------------------------------------------------------------------------------------------------------------------------------------------|
| Akbaş et al.[21] 2011 | Exercise       | NR | Home sessions | Patient's home | 6 weeks                                                           | NR                    | NR | Stretch of ITB/TFL complex, hamstring and quadriceps muscles and isometric and isotonic exercises for quadriceps, hip adductors, gluteus medius and maximus, open chain exercises like straight leg raise and leg raise with internal and external rotation and closed chain exercises like mini squat                                  |
|                       | Kinesio Taping | NR | Face-to-face  | NR             | The kinesio taping was applied at five days intervals for 6 weeks | Individually designed | NR | Kinesiotape was applied on the VMO and quadriceps femoris to provide proprioceptive stimulation for muscle weakness (origin to insertion/muscle technique) and the VL, ITB/TFL and hamstring muscles were taped to relieve tightness (origin to insertion/muscle technique) and to allow natural patella movement in the femoral groove |

|                             |                           |                 |                       |                                    |                                  |                                                                                                                                                                        |    |                                                                                                                                                                 |
|-----------------------------|---------------------------|-----------------|-----------------------|------------------------------------|----------------------------------|------------------------------------------------------------------------------------------------------------------------------------------------------------------------|----|-----------------------------------------------------------------------------------------------------------------------------------------------------------------|
| Mousavi et al.[22] 2011     | Exercise                  | NR              | NR                    | NR                                 | 3 sessions per week over 6 weeks | NR                                                                                                                                                                     | NR | Semi squat with adduction contraction                                                                                                                           |
|                             | Taping                    | NR              | NR                    | NR                                 | 3 sessions per week over 6 weeks | NR                                                                                                                                                                     | NR | Patellar lateralisation<br>The tape was attached to the lateral border of patella and moving patella and tape medially, attaching to the medial femoral condyle |
| Whittingham et al.[23] 2004 | Exercise                  | Physiotherapist | Face-to-face sessions | Army Training Regiment Basingbourn | Daily over 4 weeks               | The program was graduated so that subjects only progressed to the next exercise when 3 sets of 10 repetitions of the previous exercise could be performed without pain | NR | Lower limb non-weight-bearing and weight-bearing exercise and stretching exercises                                                                              |
|                             | McConnell Patellar Taping | Physiotherapist | Face-to-face sessions | Army Training Regiment Basingbourn | Daily over 4 weeks               | NR                                                                                                                                                                     | NR | McConnell technique to correct specific patella malalignments (tilt, glide, or rotation)                                                                        |

|                       |                 |                 |                                         |                       |                                                            |    |                          |                                                                       |
|-----------------------|-----------------|-----------------|-----------------------------------------|-----------------------|------------------------------------------------------------|----|--------------------------|-----------------------------------------------------------------------|
| Tunay et al.[24] 2003 | Exercise        | NR              | NR                                      | NR                    | 15 sessions over 3 weeks                                   | NR | NR                       | NR                                                                    |
|                       | Patellar taping | NR              | NR                                      | NR                    | 15 sessions over 3 weeks                                   | NR | NR                       | NR                                                                    |
| Clark et al.[25] 2000 | Exercise        | Physiotherapist | Face-to-face sessions and home sessions | NR and patient's home | 6 face-to-face sessions over 3 months                      | NR | Adherence in diary sheet | Hamstring. ITB, quadriceps, and gastrocnemius stretches               |
|                       |                 |                 |                                         |                       | Patients were instructed to repeat the exercises every day |    |                          | Quadriceps and hip strengthening<br><br>Functional isotonic exercises |

|        |                 |                       |    |                                       |                                                                                       |    |                                                                                                                      |
|--------|-----------------|-----------------------|----|---------------------------------------|---------------------------------------------------------------------------------------|----|----------------------------------------------------------------------------------------------------------------------|
| Taping | Physiotherapist | Face-to-face sessions | NR | 6 face-to-face sessions over 3 months | During the fourth and fifth visits, taping was only applied during painful activities | NR | Tape was applied from the lateral border of the patella, pulling medially and upward over the medial femoral condyle |
|--------|-----------------|-----------------------|----|---------------------------------------|---------------------------------------------------------------------------------------|----|----------------------------------------------------------------------------------------------------------------------|

Abbreviation: NR, not reported; TFL, tensor fascia latae; VMO, vastus medialis oblique; VL, vastus lateralis; ITB, iliotibial band; ITB/TFL, iliotibial band/tensor fascia latae.

1c. TIDieR table of interventions for included trials that have whole-body vibration as adjunct treatment

| Trial Year, author | Intervention type | Provider | How          | Where                                                                  | When and how much          | Tailoring                                                 | How well | What                                                                                                                                                                                                                                                                      |
|--------------------|-------------------|----------|--------------|------------------------------------------------------------------------|----------------------------|-----------------------------------------------------------|----------|---------------------------------------------------------------------------------------------------------------------------------------------------------------------------------------------------------------------------------------------------------------------------|
| Wu et al.[26] 2022 | Exercise          | NR       | Face-to-face | The Sports Medicine Rehabilitation Center, Guangzhou Sports University | 3 times a week for 6 weeks | All the exercises were performed with VAS scores $\leq 3$ | NR       | Knee-extensor, hip-abductor-rotator strengthening exercises in prone and supine positions with a TheraBand. Quadriceps and hip muscle resistance training were performed in the sitting and lateral recumbent positions with the TheraBand. Hip-knee muscle strengthening |

|                      |    |              |                                                                        |                            |                                                                                                                 |    |                                                                                                                                                                                                                                                                                                                                                                                                                                                            |
|----------------------|----|--------------|------------------------------------------------------------------------|----------------------------|-----------------------------------------------------------------------------------------------------------------|----|------------------------------------------------------------------------------------------------------------------------------------------------------------------------------------------------------------------------------------------------------------------------------------------------------------------------------------------------------------------------------------------------------------------------------------------------------------|
|                      |    |              |                                                                        |                            |                                                                                                                 |    | exercises were performed using straight leg lifting with sandbags                                                                                                                                                                                                                                                                                                                                                                                          |
| Whole-body vibration | NR | Face-to-face | The Sports Medicine Rehabilitation Center, Guangzhou Sports University | 3 times a week for 6 weeks | Participants were asked to maintain the maximum flexion angle they could with pain level of VAS scores $\leq 3$ | NR | Patients were required to put the leg experiencing pain on the vibration platform of the whole-body vibration device (Galileo Med L, Novotech Inc, Germany), with hip and knee placed at 90° of flexion and the TheraBand being resisted by hip isometric antagonistic contractions in abduction-external rotation (intensity of 10RM). Otherwise, they were asked to maintain the maximum flexion angle they could with pain level of VAS scores $\leq 3$ |

|                       |                      |                 |              |    |                                  |    |    |                                                                                                                                                                                                                                                                                                                                |
|-----------------------|----------------------|-----------------|--------------|----|----------------------------------|----|----|--------------------------------------------------------------------------------------------------------------------------------------------------------------------------------------------------------------------------------------------------------------------------------------------------------------------------------|
| Rasti et al.[27] 2020 | Exercise             | Physiotherapist | Face-to-face | NR | 3 sessions per week over 4 weeks | NR | NR | Quadriceps setting, supine straight leg raise, side-lying straight leg raise, single-leg stance. Self-stretches of the hamstring, quadriceps calf muscles and ITB.<br><br>Dynamic exercises: single-leg cable machine exercises in flexion, extension and abduction directions, bilateral mini-squat and prone-plank exercises |
|                       | Whole-body vibration | Physiotherapist | Face-to-face | NR | 3 sessions per week over 4 weeks | NR | NR | The participants stood on the whole-body vibration platform in a squatting position with 30 degrees of knee flexion. Each session included 2 sets of 60-s training with a 30-s interval between sets. The frequency                                                                                                            |



|                               |          |                 |              |                                                      |                                  |                                                                                                                                                                                                      |    |                                                                                                                                                                           |
|-------------------------------|----------|-----------------|--------------|------------------------------------------------------|----------------------------------|------------------------------------------------------------------------------------------------------------------------------------------------------------------------------------------------------|----|---------------------------------------------------------------------------------------------------------------------------------------------------------------------------|
|                               |          |                 |              |                                                      |                                  |                                                                                                                                                                                                      |    | and amplitude of whole-body vibration (Fit-Vibe Excel pro, GymnaUnighy NV, Bilzen, Belgium) were set at 50 Hz and 4mm, respectively                                       |
| Yañez-Álvarez et al.[28] 2020 | Exercise | Physiotherapist | Face-to-face | The AY360° Health and Sport Clinic (Seville, Spain). | 3 sessions per week over 4 weeks | Based on a modified pain monitoring model, pain or discomfort only was allowed during the exercise execution if was acceptable (< 4/10) and if returned to the same baseline level of pain as before | NR | The designed program consisted of a single bout of 18-exercise routine. Isometric and isotonic exercises that involve core, gluteal and quadriceps muscles were selected. |

|                       |                      |                 |                                |                                                      |                                  |                                       |    |                                                                                                                                                                                                                                                                                                         |
|-----------------------|----------------------|-----------------|--------------------------------|------------------------------------------------------|----------------------------------|---------------------------------------|----|---------------------------------------------------------------------------------------------------------------------------------------------------------------------------------------------------------------------------------------------------------------------------------------------------------|
|                       |                      |                 |                                |                                                      |                                  | starting<br>exercises<br>within 24 h. |    |                                                                                                                                                                                                                                                                                                         |
|                       | Whole-body vibration | Physiotherapist | Face-to-face                   | The AY360° Health and Sport Clinic (Seville, Spain). | 3 sessions per week over 4 weeks | NR                                    | NR | The frequency of the vibration platform was fixed at 40 Hz along the study and the amplitude of the vibration platform (peak-to-peak displacement) was set at 2mm in the first two weeks, and 4mm during the following two. The acceleration peak for these parameters were 3.2G and 6.4G respectively. |
| Corum et al.[29] 2018 | Exercise             | NR              | Face-to-face and home sessions | Clinic and patient's home                            | 3 days per week over 8 weeks     | NR                                    | NR | Stretching exercises consisting of quadriceps, hamstring, gastrocnemius and ITB stretching. Strength exercises consisting of isometric quadriceps setting, knee extensions,                                                                                                                             |

|                      |    |              |        |                              |    |    |                                                                                                                                                                                                                                                                                                                                                                                                                                                                                                                                                  |
|----------------------|----|--------------|--------|------------------------------|----|----|--------------------------------------------------------------------------------------------------------------------------------------------------------------------------------------------------------------------------------------------------------------------------------------------------------------------------------------------------------------------------------------------------------------------------------------------------------------------------------------------------------------------------------------------------|
|                      |    |              |        |                              |    |    | double-legged wall squat.                                                                                                                                                                                                                                                                                                                                                                                                                                                                                                                        |
| Whole-body vibration | NR | Face-to-face | Clinic | 3 days per week over 8 weeks | NR | NR | The frequency of the vibration platform (amount of vibrations per second) was fixed at 35 Hz during the eight weeks and the amplitude of the vibration platform (peak-to-peak displacement) was set at 2 mm in the first four weeks, and 4 mm during the second four weeks of the study. Lower extremity stretching and strength exercises were performed. Lower extremity stretching exercises consisted of quadriceps, hamstring, gastrocnemius and iliotibial band stretching. Strength exercises consisting of lunge-step, semi-squat, ball- |

squeeze squat, and  
dynamic squat.

Abbreviation: NR, not reported, VAS, visual analogue scale; ITB, iliotibial band, RM, repetition maximum

1d. TIDieR table of interventions for included trials that have dry needling as adjunct treatment

| Trial<br>Year, author | Intervention<br>type | Provider                                            | How                            | Where                     | When and how<br>much                                                           | Tailoring                                                          | How well | What                                                                                                                                                                                               |
|-----------------------|----------------------|-----------------------------------------------------|--------------------------------|---------------------------|--------------------------------------------------------------------------------|--------------------------------------------------------------------|----------|----------------------------------------------------------------------------------------------------------------------------------------------------------------------------------------------------|
| Ma et al.[30] 2020    | Exercise             | NR                                                  | NR                             | NR                        | Daily for 6 weeks                                                              | NR                                                                 | NR       | Stretching exercise of the quadriceps                                                                                                                                                              |
|                       | Dry needling         | Clinicians who had received 4 years of dry needling | Face-to-face                   | NR                        | Once a week for 6 weeks                                                        | NR                                                                 | NR       | The ‘clean technique’ was performed with 0.35 × 40 mm disposable stainless-steel needles into three of the four quadriceps femoris muscles (vastus medialis, rectus femoris, and vastus lateralis) |
| Zarei et al.[31] 2020 | Exercise             | Physiotherapist                                     | Face-to-face and Home sessions | Clinic and patient’s home | 2 sessions per week at the clinic and 3 sessions per week at home, for 4 weeks | Exercises were tailored based on individual symptoms and abilities | NR       | Stretching and exercise for quadriceps and core                                                                                                                                                    |

|                         |              |                 |               |                |                         |    |    |                                                                                                                                                                                           |
|-------------------------|--------------|-----------------|---------------|----------------|-------------------------|----|----|-------------------------------------------------------------------------------------------------------------------------------------------------------------------------------------------|
|                         | Dry needling | Physiotherapist | Face-to-face  | Clinic         | Once a week for 4 weeks | NR | NR | The ‘fast-in and fast-out technique’ was performed with 0.30x50-mm and 0.30x100-mm needles into the gluteus medius ipsilateral and quadratus lumborum contralateral                       |
| Sutlive et al.[32] 2018 | Exercise     | NR              | Home sessions | Patient’s home | Daily over 3 days       | NR | NR | Isometric quadriceps femoris contractions and quadriceps stretching exercises                                                                                                             |
|                         | Dry needling | NR              | Face-to-face  | NR             | Single session          | NR | NR | The ‘clean technique’ was performed with x 40 mm stainless steel acupuncture needle into three of four the quadriceps femoris muscles (vastus medialis, rectus femoris, vastus lateralis) |

Abbreviation: NR, not reported

1e. TIDieR table of interventions for included trials that have knee brace as adjunct treatment

| Trial<br>Year, author       | Intervention<br>type | Provider        | How              | Where             | When and how<br>much                                                                                                              | Tailoring                                                                                             | How well | What                                                                                                                                                                                                                                                                                                                                                                                              |
|-----------------------------|----------------------|-----------------|------------------|-------------------|-----------------------------------------------------------------------------------------------------------------------------------|-------------------------------------------------------------------------------------------------------|----------|---------------------------------------------------------------------------------------------------------------------------------------------------------------------------------------------------------------------------------------------------------------------------------------------------------------------------------------------------------------------------------------------------|
| Petersen et al.[33]<br>2016 | Exercise             | NR              | Home<br>sessions | Patient’s<br>home | 12 60-minute supervised sessions of Krankengymnastik am Gerät over 6 weeks. Daily home 15-minute sessions of Patella move program | After a detailed analysis, the physical therapist creates a customised training plan for each patient | NR       | <p>The goal of Krankengymnastik am Gerät is to improve strength, coordination, endurance, and flexibility of the lower extremity, including the hip muscles</p> <p>Patella Move<br/>The five exercises are as follows: Sitting and flexing the knee, sitting and tensing the quadriceps, two-legged stance and squat, one-legged stance and squat, and one-legged stance and lateral pressure</p> |
|                             | Patellar brace       | Study physician | Home sessions    | Patient’s home    | Patients were instructed to wear the brace over a minimum period                                                                  | The brace was customised for the patient                                                              | NR       | Medially directed force is applied to the patella by a tracking system.                                                                                                                                                                                                                                                                                                                           |

|                           |            |    |                                    |                                     |                                                                                                                                                                                             |                                                                                                                                                                                                                                                                                     |    |                                                                                                                                                                                                                                                                                                                                                                                                                                       |
|---------------------------|------------|----|------------------------------------|-------------------------------------|---------------------------------------------------------------------------------------------------------------------------------------------------------------------------------------------|-------------------------------------------------------------------------------------------------------------------------------------------------------------------------------------------------------------------------------------------------------------------------------------|----|---------------------------------------------------------------------------------------------------------------------------------------------------------------------------------------------------------------------------------------------------------------------------------------------------------------------------------------------------------------------------------------------------------------------------------------|
| Denton et al.[34]<br>2005 | Exercise   | NR | Outpatient<br>and home<br>sessions | Outpatient<br>and patient’s<br>home | of 6 weeks for at<br>least 6 h a day<br><br>Outpatient<br>sessions were<br>performed 3 times<br>per week for 6<br>weeks<br><br>Home sessions<br>were performed<br>once daily for 6<br>weeks | by the study<br>physician<br><br>Patients<br>continued to<br>exercise in<br>each phase<br>until they<br>demonstrated<br>the ability to<br>complete 30<br>repetitions of<br>each exercise<br>in that phase<br>with a pain<br>rating of less<br>than 2 on the<br>visual pain<br>scale | NR | Straight leg raises,<br>standing hip flexion<br>straight leg raises<br>with sport cord.<br><br>Quadriceps,<br>hamstring, iliotibial<br>band and hip flexor<br>stretches.<br><br>45° squats, 45°<br>thoracic wall slides,<br>resisted terminal knee<br>extension in standing.<br><br>Forward and lateral<br>step-ups, step-downs,<br>double-leg shuttle leg<br>press, single-leg<br>shuttle leg press,<br>treadmill and<br>stairmaster |
|                           | Knee brace | NR | Outpatient<br>and home<br>sessions | Outpatient<br>and patient’s<br>home | The protonic brace<br>system was used<br>during both<br>outpatient and<br>home sessions                                                                                                     | The<br>resistance<br>level for the<br>knee brace<br>was<br>determined                                                                                                                                                                                                               | NR | The system includes a<br>brace set to resist<br>knee flexion and a set<br>of specific exercises<br>to perform daily                                                                                                                                                                                                                                                                                                                   |

|                     |                  |            |               |                |                    |                                                                                                           |                                                                        |                                                                                                                                                                                                                                                                        |
|---------------------|------------------|------------|---------------|----------------|--------------------|-----------------------------------------------------------------------------------------------------------|------------------------------------------------------------------------|------------------------------------------------------------------------------------------------------------------------------------------------------------------------------------------------------------------------------------------------------------------------|
|                     |                  |            |               |                |                    | with the goal to identify the lowest level of resistance required by the patient to exercise without pain |                                                                        | Through resistance to knee flexion, the system is advertised to decrease retropatellar contact pressure due to changes in pelvis inclination and available hip rotation                                                                                                |
| Lun et al.[35] 2005 | Exercise         | Researcher | Home sessions | Patient’s home | Daily for +51 days | NR                                                                                                        | Subjects were given a journal to document when the exercises were done | Lower limb strengthening and stretching exercises                                                                                                                                                                                                                      |
|                     | Patellar bracing | Researcher | Home sessions | Patient’s home | Daily for +51 days | NR                                                                                                        | Subjects were given a journal to document when the brace was worn      | Participants were fit with a patella brace (Special FX Knee Brace; Generation II Orthotics, Inc, Richmond, BC). The brace has a Y-shaped inferior patellar buttress pad and an external stabilisation strap to help control patellar movement. In those diagnosed with |



|  |                                                                                                                              |
|--|------------------------------------------------------------------------------------------------------------------------------|
|  | bilateral PFP, both knees were fit with a brace. Subjects were encouraged to wear their brace at all times except for sleep. |
|--|------------------------------------------------------------------------------------------------------------------------------|

Abbreviation: NR, not reported; PFP, patellofemoral pain

1f. TIDieR table of interventions for included trials that have manual therapy as adjunct treatment

| Trial<br>Year, author | Intervention<br>type                    | Provider | How          | Where                                                                                                           | When and<br>how much                | Tailoring | How well | What                                                                                                     |
|-----------------------|-----------------------------------------|----------|--------------|-----------------------------------------------------------------------------------------------------------------|-------------------------------------|-----------|----------|----------------------------------------------------------------------------------------------------------|
| Anwar et al.[36] 2022 | Exercise                                | NR       | Face-to-face | Outpatient<br>physiotherapy<br>department of<br>Amin<br>Welfare<br>Teaching<br>Hospital<br>Sialkot,<br>Pakistan | 2 times a<br>week during<br>3 weeks | NR        | NR       | Quadriceps isometric<br>exercises                                                                        |
|                       | Pain release<br>phenomenon<br>technique | NR       | Face-to-face | Outpatient<br>physiotherapy<br>department of<br>Amin<br>Welfare                                                 | 2 times a<br>week during<br>3 weeks | NR        | NR       | Pain release<br>phenomenon is a pain<br>provoking technique,<br>and the pain is<br>resolved within 25-30 |

|                         |          |    |              |                                                                             |                                    |    |    |                                                                                                                                                                                                                                                                                            |
|-------------------------|----------|----|--------------|-----------------------------------------------------------------------------|------------------------------------|----|----|--------------------------------------------------------------------------------------------------------------------------------------------------------------------------------------------------------------------------------------------------------------------------------------------|
|                         |          |    |              | Teaching Hospital Sialkot, Pakistan                                         |                                    |    |    | seconds (for knee joint). Pain is evaluated at the range where it started. Pressure was maintained for 15-20 seconds. After getting release from pain within 15-20 seconds, PRP in a new range was applied with increase force, until a substantial amount of pain reduction was achieved. |
| Fatimah et al.[37] 2021 | Exercise | NR | Face-to-face | The Lady Reading Hospital and Hayatabad Medical Complex, Peshawar, Pakistan | 3 sessions per week during 4 weeks | NR | NR | Exercises included semi-squatting, straight leg raise and hamstring stretch, quadriceps isometrics, terminal knee extension with elastic band, adductor squeeze and hip abduction in standing position with elastic band                                                                   |

|                        |                           |                 |                                |                                                                             |                                                                                         |                                                                                                            |    |                                                                                                                                                                             |
|------------------------|---------------------------|-----------------|--------------------------------|-----------------------------------------------------------------------------|-----------------------------------------------------------------------------------------|------------------------------------------------------------------------------------------------------------|----|-----------------------------------------------------------------------------------------------------------------------------------------------------------------------------|
| Telles et al.[38] 2016 | Tibiofemoral mobilisation | NR              | Face-to-face                   | The Lady Reading Hospital and Hayatabad Medical Complex, Peshawar, Pakistan | 3 sessions per week during 4 weeks                                                      | NR                                                                                                         | NR | Tibiofemoral mobilisation through anterior-posterior glide, which is the Kaltenborn technique                                                                               |
|                        | Exercise                  | Physiotherapist | Face-to-face and home sessions | NR and patient's home                                                       | Supervised: 2 sessions per week during 5 weeks.<br>Home sessions: daily during 5 weeks. | Exercise intensity was determined by participant's ability to complete 10 repetitions for a given exercise | NR | Five exercises to strengthen hip muscles were performed lying on the side, sitting, and standing (three sets of ten repetitions) with ankle cuff weights or elastic bands.  |
|                        | Myofascial techniques     | Physiotherapist | Face-to-face                   | NR                                                                          | NR                                                                                      | The therapist used thumbs to apply gentle sustained pressure in the muscle's longitudinal direction.       | NR | The myofascial release technique was performed in the supine position for the rectus femoris muscle and side lying for tensor fasciae latae muscle and iliotibial band. The |

Once a tissue barrier was located, a static pressure was applied initially.

therapist used thumbs to apply gentle sustained pressure in the muscle’s longitudinal direction. Once a tissue barrier was located, a static pressure was applied initially.

Abbreviation: NR, not reported

1g. TIDieR table of interventions for included trials that have blood flow restriction as adjunct treatment

| Trial<br>Year, author        | Intervention<br>type | Provider        | How          | Where                                                                           | When and<br>how much       | Tailoring                                                                                                             | How well | What                                                                                                                               |
|------------------------------|----------------------|-----------------|--------------|---------------------------------------------------------------------------------|----------------------------|-----------------------------------------------------------------------------------------------------------------------|----------|------------------------------------------------------------------------------------------------------------------------------------|
| Constantinou et al.[39] 2022 | Exercise             | Physiotherapist | Face-to-face | Musculoskeletal laboratories of the European University Cyprus, Nicosia, Cyprus | 3 times a week for 4 weeks | Exercise progression was individualised with weekly repetition maximum testing. Pain with exercise was not permitted. | NR       | Hip and knee strengthening exercises with a combination of hamstrings, plantar flexors, quadriceps and iliotibial band stretching. |

|                       |                        |                 |              |                                                                                 |                               |                                                                                                                                                     |                                                                         |                                                                                                                                                   |
|-----------------------|------------------------|-----------------|--------------|---------------------------------------------------------------------------------|-------------------------------|-----------------------------------------------------------------------------------------------------------------------------------------------------|-------------------------------------------------------------------------|---------------------------------------------------------------------------------------------------------------------------------------------------|
|                       | Blood flow restriction | Physiotherapist | Face-to-face | Musculoskeletal laboratories of the European University Cyprus, Nicosia, Cyprus | 3 times a week for 4 weeks    | Participants limb occlusion pressure for blood flow restriction training was estimated at the beginning of each session, for all exercise positions | NR                                                                      | Mechanical resistance was used at a load of 30% of one repetition maximum with a limb occlusion pressure of 70%                                   |
| Giles et al.[40] 2017 | Exercise               | Physiotherapist | Face-to-face | NR                                                                              | 3 times per week over 8 weeks | If pain was reported to be greater than 2/10 on the VAS the load was reduced by 20%                                                                 | Participants recorded each of the scheduled sessions that they attended | 5 minutes of ‘light’ intensity exercise bike to warm up, leg press between 0° and 60° knee flexion and leg extension from 90° to 45° knee flexion |
|                       | Blood flow restriction | Physiotherapist | Face-to-face | NR                                                                              | 3 times per week over 8 weeks | Cuff pressure was increased until the pedal pulse could no longer be                                                                                | Participants recorded each of the scheduled sessions that they attended | The cuff was placed on the proximal thigh and inflated to the prescribed pressure in the resting position of the exercise to be                   |

|  |                                                                        |                                                                                                                                                |
|--|------------------------------------------------------------------------|------------------------------------------------------------------------------------------------------------------------------------------------|
|  | identified (maximum 250 mm Hg, velocity 92 cm/s), then slowly released | performed (leg press or leg extension). The exercises were performed at approximately 30% of 1RM with the blood low restriction cuff inflated. |
|--|------------------------------------------------------------------------|------------------------------------------------------------------------------------------------------------------------------------------------|

Abbreviation: NR, not reported; VAS, visual analogue scale; RM, repetition maximum

1h. TIDieR table of interventions for included trials that have EMG biofeedback as adjunct treatment

| Trial Year, author | Intervention type | Provider        | How           | Where          | When and how much | Tailoring                                               | How well | What                                                                                                                          |
|--------------------|-------------------|-----------------|---------------|----------------|-------------------|---------------------------------------------------------|----------|-------------------------------------------------------------------------------------------------------------------------------|
| Qi et al.[41] 2007 | Exercise          | Physiotherapist | Home sessions | Patient’s home | Daily for 8 weeks | The exercises were performed within the pain-free range | NR       | Warm-up, flexibility and stretching exercise, balance and proprioceptive training, plyometric and agility training            |
|                    | EMG biofeedback   | Physiotherapist | Home sessions | Patient’s home | Daily for 8 weeks | NR                                                      | NR       | Electrodes were places along the fiber directions of VMO and VL. The instruction gave to participants was to aim at achieving |

|                           |                 |                    |              |                                                                                                          |                                                                  |    |    |                                                                                                                                                                                                                                                                                                                                                                                                                           |
|---------------------------|-----------------|--------------------|--------------|----------------------------------------------------------------------------------------------------------|------------------------------------------------------------------|----|----|---------------------------------------------------------------------------------------------------------------------------------------------------------------------------------------------------------------------------------------------------------------------------------------------------------------------------------------------------------------------------------------------------------------------------|
| Dursun et al.[42]<br>2001 | Exercise        | Physical therapist | Face-to-face | A physical medicine and rehabilitation department in a research hospital of a university referral center | 5 days a week for the first 4 weeks and 3 days a week thereafter | NR | NR | selective increase of VMO activity during the exercises, while maintaining VL constant                                                                                                                                                                                                                                                                                                                                    |
|                           | EMG biofeedback | Physical therapist | Face-to-face | A physical medicine and rehabilitation department in a research hospital of a university referral center | 3 days a week for 4 weeks                                        | NR | NR | Strengthening exercises for quadriceps and vastus medialis obliquus<br><br>Flexibility training;<br><br>Proprioception training<br><br>Endurance training by bicycling<br><br>Electrodes were places in the VM and VL. Patients were instructed to contract the VM above the 80% of muscle strength threshold level and to maintain the audible signal for 10 seconds while attempting to decrease the activity of the VL |

by remaining below its threshold level

Abbreviation: NR, not reported; EMG, electromyographic; VMO, vastus medialis obliquus; VL, vastus lateralis; VM, vastus medialis

1i. TIDieR table of interventions for included trial that have internal and external attentional focus as adjunct treatment

| Trial<br>Year, author          | Intervention<br>type | Provider           | How          | Where | When and<br>how much       | Tailoring                                                                | How well | What                                                                                                                                                                                           |
|--------------------------------|----------------------|--------------------|--------------|-------|----------------------------|--------------------------------------------------------------------------|----------|------------------------------------------------------------------------------------------------------------------------------------------------------------------------------------------------|
| Aghakeshizadeh et al.[43] 2021 | Exercise             | Physical therapist | Face-to-face | NR    | 3 times a week for 6 weeks | The exercises were performed painlessly                                  | NR       | Exercise program to increase the strength of the hip and knee muscles and to improve the motor control of the lower limbs                                                                      |
|                                | Internal focus       | Physical therapist | Face-to-face | NR    | 3 times a week for 6 weeks | The patients were informed about the compensatory and incorrect movement | NR       | In the internal focus group, subjects were taught to "prevent the hip to adduction move", "to avoid the hip to inwardly or internally rotate" or "to keep the trunk in the straight direction" |
|                                | External focus       |                    |              |       |                            |                                                                          |          | In the external focus group, the researcher provided the patients with feedback, during                                                                                                        |



|  |                                                                                                                                                                                                                                                                                     |
|--|-------------------------------------------------------------------------------------------------------------------------------------------------------------------------------------------------------------------------------------------------------------------------------------|
|  | the exercise, using simultaneously her/his hand and theraband to correct the wrong movement pattern; so that the researcher placed her/his hand on the subject body or pelvis while performing the movement, and informed the patient about the compensatory and incorrect movement |
|--|-------------------------------------------------------------------------------------------------------------------------------------------------------------------------------------------------------------------------------------------------------------------------------------|

Abbreviation: NR, not reported

1j. TIDieR table of interventions for included trial that have mindfulness as adjunct treatment

| Trial<br>Year, author      | Intervention<br>type | Provider                               | How          | Where                    | When and<br>how much                       | Tailoring                                                                                  | How well | What                                                                                                                                                       |
|----------------------------|----------------------|----------------------------------------|--------------|--------------------------|--------------------------------------------|--------------------------------------------------------------------------------------------|----------|------------------------------------------------------------------------------------------------------------------------------------------------------------|
| Bagheri et al.[44]<br>2021 | Exercise             | Researcher and<br>a<br>physiotherapist | Face-to-face | University<br>laboratory | 3 sessions<br>per week<br>over 18<br>weeks | If<br>participants<br>did all the<br>exercises<br>without (1)<br>aggravating<br>their knee | NR       | Quadriceps and lateral<br>retinaculum,<br>hamstrings, soleus,<br>gastrocnemius, and<br>iliotibial band<br>stretches; straight leg<br>raise in supine; side |

|             |                            |                                |                                          |                                              |                                                                                                                                                   |    |                                                                                                                                                                                                      |
|-------------|----------------------------|--------------------------------|------------------------------------------|----------------------------------------------|---------------------------------------------------------------------------------------------------------------------------------------------------|----|------------------------------------------------------------------------------------------------------------------------------------------------------------------------------------------------------|
|             |                            |                                |                                          |                                              | pain, (2) excessive fatigue, or (3) local muscle pain 48 hours after the training session, the training load was increased                        |    | plank, prone plank, back plank; step exercise on a 20-cm step; one leg jump from a 20 –cm step; single leg stance on unstable platform                                                               |
| Mindfulness | Trained sport psychologist | Face-to-face and home sessions | University laboratory and patient’s home | Daily over 8 weeks and 2 supervised sessions | When a participant had difficulty learning any skill, the sport psychologist spent more time with that person at the end of the session as needed | NR | The mindfulness-exercise group received instruction on mindfulness meditation practices, such as breathing meditation, body scan meditation, gentle yoga, sitting meditation, and walking meditation |

Abbreviation: NR, not reported

1k. TIDieR table of interventions for included trial that have foot orthoses as adjunct treatment

| Trial<br>Year, author | Intervention<br>type | Provider              | How                                  | Where                           | When and<br>how much       | Tailoring | How well | What                                                                                                                                                                                                                                                                                     |
|-----------------------|----------------------|-----------------------|--------------------------------------|---------------------------------|----------------------------|-----------|----------|------------------------------------------------------------------------------------------------------------------------------------------------------------------------------------------------------------------------------------------------------------------------------------------|
| Eng et al.[45] 1993   | Exercise             | NR                    | Face-to-face<br>and home<br>sessions | Clinic and<br>patient’s<br>home | Twice a day<br>for 8 weeks | NR        | NR       | Exercise program of<br>isometric quadriceps<br>femoris muscle<br>contractions and<br>straight leg raising in a<br>supine position and<br>quadriceps femoris<br>and hamstrings muscle<br>stretching exercises                                                                             |
|                       | Foot<br>orthoses     | Physical<br>therapist | Face-to-face<br>and home<br>sessions | Clinic and<br>patient’s<br>home | Daily over 8<br>weeks      | NR        | NR       | Soft orthotic<br>constructed from a flat<br>Spenco (Spenco<br>Sports Medicine<br>Products, Toronto,<br>Ontario, Canada M4W<br>319) insole and posted<br>medially with rubber<br>wedges in the hindfoot<br>and forefoot to<br>position the subtalar<br>joint toward a neutral<br>position |

Abbreviation: NR, not reported

## References

- 1 Jing W, Yingce Y, Xiaowei Y, *et al.* Intervention of muscle strength training combined with neuromuscular electrical stimulation on lower limb function and biomechanical changes in patients with patellofemoral pain. *CJTER*. 2024;28(9):1365-1371. doi:10.12307/2024.036.3.
- 2 Albornoz-Cabello M, Ibáñez-Vera AJ, Barrios-Quinta CJ, *et al.* Effects of Radiofrequency Diathermy Plus Therapeutic Exercises on Pain and Functionality of Patients with Patellofemoral Pain Syndrome: A Randomized Controlled Trial. *J Clin Med*. 2023;12:2348.
- 3 MV VK, Subramanian NB, Sreelatha S, *et al.* Physiotherapeutic interventions on quadriceps muscle architecture in patello-femoral pain syndrome. *Bioinformation*. 2023;19:454–9.
- 4 Qayyum HA, Arsalan SA, Tanveer F, *et al.* Role of high power laser therapy on pain reduction in patients with patellofemoral pain syndrome. *Pak J Med Health Sci*. 2022;16:9–12.
- 5 Rodrigues GM, Paixão A, Arruda T, *et al.* Anodal transcranial direct current stimulation increases muscular strength and reduces pain perception in women with patellofemoral pain. *J Strength Cond Res*. 2022;36:371–8.
- 6 Albornoz-Cabello M, Ibáñez-Vera AJ, Aguilar-Ferrándiz ME, *et al.* Monopolar dielectric diathermy by emission of radiofrequency in Patellofemoral pain. A single-blind-randomized clinical trial. *Electromagn Biol Med*. 2020;39:282–9.
- 7 Celik D, Argut SK, Türker N, *et al.* The effectiveness of superimposed neuromuscular electrical stimulation combined with strengthening exercises on patellofemoral pain: A randomized controlled pilot trial. *J Back Musculoskelet Rehabil*. 2020;33:693–9.

- 8 Talbot LA, Solomon Z, Webb L, *et al.* Electrical Stimulation Therapies for Active Duty Military with Patellofemoral Pain Syndrome: A Randomized Trial. *Mil Med.* 2020;185:e963–71.
- 9 Glaviano NR, Marshall AN, Mangum LC, *et al.* Impairment-based rehabilitation with patterned electrical neuromuscular stimulation and lower extremity function in individuals with patellofemoral pain: a preliminary study. *J Athl Train.* 2019;54:255–69.
- 10 Nouri F, Raeissadat SA, Eliaspour D, *et al.* Efficacy of high-power laser in alleviating pain and improving function of patients with patellofemoral pain syndrome: a single-blind randomized controlled trial. *J Lasers Med Sci.* 2019;10:37–43.
- 11 Iammarrone CS, Cadossi M, Sambri A, *et al.* Is there a role of pulsed electromagnetic fields in management of patellofemoral pain syndrome? Randomized controlled study at one year follow-up. *Bioelectromagnetics.* 2016;37:81–8.
- 12 Bily W, Trimmel L, Mödlin M, *et al.* Training program and additional electric muscle stimulation for patellofemoral pain syndrome: a pilot study. *Arch Phys Med Rehabil.* 2008;89:1230–6.
- 13 Akarcali I, Tugay N, Kaya D, *et al.* The role of high voltage electrical stimulation in the rehabilitation of patellofemoral pain. *Pain Clin.* 2002;14:207–12.
- 14 Lee JH, Rhim HC, Jang K-M. Effect of Adding Kinesio Taping to Exercise Therapy in the Treatment of Patellofemoral Pain Syndrome. *Medicina (Mex).* 2023;59:754.
- 15 Şahan TY, Vergili Ö, Oktaş B. Investigation of new application technique named star taping in patellofemoral pain: a randomized, single-blind, and placebo-controlled study. *Somatosens Mot Res.* 2023;1–8.
- 16 Songur A, Demirdel E, Kılıc O, *et al.* The effects of different taping methods on patellofemoral alignment, pain and function in individuals with patellofemoral pain:

- A randomized controlled trial. *PM R*. Published Online First: 29 August 2023. doi: 10.1002/pmrj.13067.
- 17 Basbug P, Kilic RT, Atay AO, *et al*. The effects of progressive neuromuscular exercise program and taping on muscle strength and pain in patellofemoral pain. A randomized controlled blind study. *Somatosens Mot Res*. 2022;39:39–45.
  - 18 Arrebola LS, Teixeira de Carvalho R, Lam Wun PY, *et al*. Investigation of different application techniques for Kinesio Taping® with an accompanying exercise protocol for improvement of pain and functionality in patients with patellofemoral pain syndrome: A pilot study. *J Bodyw Mov Ther*. 2020;24:47–55.
  - 19 Ghourbanpour A, Talebi GA, Hosseinzadeh S, *et al*. Effects of patellar taping on knee pain, functional disability, and patellar alignments in patients with patellofemoral pain syndrome: A randomized clinical trial. *J Bodyw Mov Ther*. 2018;22:493–7.
  - 20 Günay E, Sarıkaya S, Özdolap Ş, *et al*. Effectiveness of the kinesiotaping in the patellofemoral pain syndrome. *Turk J Phys Med Rehabil*. 2017;63:299–306.
  - 21 Akbaş E, Atay AO, Yüksel I. The effects of additional kinesio taping over exercise in the treatment of patellofemoral pain syndrome. *Acta Orthop Traumatol Turc*. 2011;45:335–41.
  - 22 Mousavi SM, Khayambashi K, Nejadian SL, *et al*. The Effects of Kinesiotape and Strength Training on Knee Pain and Quadriceps Strength in People with Patellofemoral Pain Syndrome (PFPS). *J Isfahan Med Sch*. 2011;29:1657–68.
  - 23 Whittingham M, Palmer S, Macmillan F. Effects of taping on pain and function in patellofemoral pain syndrome: a randomized controlled trial. *J Orthop Sports Phys Ther*. 2004;34:504–10.
  - 24 Tunay VB, Baltacı G, Tunay S, *et al*. A comparison of different treatment approaches to patellofemoral pain syndrome. *The Pain Clinic*. 2003;15:179–84.

- 25 Clark DI, Downing N, Mitchell J, *et al.* Physiotherapy for anterior knee pain: a randomised controlled trial. *Ann Rheum Dis.* 2000;59:700–4.
- 26 Wu Z, Zou Z, Zhong J, *et al.* Effects of whole-body vibration plus hip-knee muscle strengthening training on adult patellofemoral pain syndrome: a randomized controlled trial. *Disabil Rehabil.* 2022;44:6017–25.
- 27 Rasti E, Rojhani-Shirazi Z, Ebrahimi N, *et al.* Effects of whole body vibration with exercise therapy versus exercise therapy alone on flexibility, vertical jump height, agility and pain in athletes with patellofemoral pain: a randomized clinical trial. *BMC Musculoskelet Disord.* 2020;21:705.
- 28 Yañez-Álvarez A, Bermúdez-Pulgarín B, Hernández-Sánchez S, *et al.* Effects of exercise combined with whole body vibration in patients with patellofemoral pain syndrome: a randomised-controlled clinical trial. *BMC Musculoskelet Disord.* 2020;21:582.
- 29 Corum M, Basoglu C, Yakal S, *et al.* Effects of whole body vibration training on isokinetic muscular performance, pain, function, and quality of life in female patients with patellofemoral pain: a randomized controlled trial. *J Musculoskelet Neuronal Interact.* 2018;18:473–84.
- 30 Ma Y-T, Li L-H, Han Q, *et al.* Effects of trigger point dry needling on neuromuscular performance and pain of individuals affected by patellofemoral pain: a randomized controlled trial. *J Pain Res.* 2020;13:1677–86.
- 31 Zarei H, Bervis S, Piroozi S, *et al.* Added value of gluteus medius and quadratus lumborum dry needling in improving knee pain and function in female athletes with patellofemoral pain syndrome: a randomized clinical trial. *Arch Phys Med Rehabil.* 2020;101:265–74.

- 32 Sutlive TG, Golden A, King K, *et al.* Short-term effects of trigger point dry needling on pain and disability in subjects with patellofemoral pain syndrome. *Int J Sports Phys Ther.* 2018;13:462–73.
- 33 Petersen W, Ellermann A, Rembitzki IV, *et al.* Evaluating the potential synergistic benefit of a realignment brace on patients receiving exercise therapy for patellofemoral pain syndrome: a randomized clinical trial. *Arch Orthop Trauma Surg.* 2016;136:975–82.
- 34 Denton J, Willson JD, Ballantyne BT, *et al.* The addition of the Protonics brace system to a rehabilitation protocol to address patellofemoral joint syndrome. *J Orthop Sports Phys Ther.* 2005;35:210–9.
- 35 Lun VMY, Wiley JP, Meeuwisse WH, *et al.* Effectiveness of patellar bracing for treatment of patellofemoral pain syndrome. *Clin J Sport Med.* 2005;15:235–40.
- 36 Anwar S, Javaid M, Malik S, *et al.* Effects of mulligan pain release phenomenon technique in management of patellofemoral pain syndrome: RCT. *Pak J Med Health Sci.* 2022;16:72–72. doi: 10.53350/pjmhs2216372.
- 37 Fatimah I, Waqqar S. Effects of tibiofemoral mobilization in patients of Patellofemoral pain syndrome. *JPMA J Pak Med Assoc.* 2021;71:2506–10.
- 38 Telles G, Cristovão DR, Belache FATC, *et al.* The effect of adding myofascial techniques to an exercise programme for patients with anterior knee pain. *J Bodyw Mov Ther.* 2016;20:844–50.
- 39 Constantinou A, Mamais I, Papathanasiou G, *et al.* Comparing hip and knee focused exercises versus hip and knee focused exercises with the use of blood flow restriction training in adults with patellofemoral pain. *Eur J Phys Rehabil Med.* 2022;58:225–35.



- 40 Giles L, Webster KE, McClelland J, *et al.* Quadriceps strengthening with and without blood flow restriction in the treatment of patellofemoral pain: a double-blind randomised trial. *Br J Sports Med.* 2017;51:1688–94.
- 41 Qi Z, Ng GYF. EMG analysis of vastus medialis obliquus/vastus lateralis activities in subjects with patellofemoral pain syndrome before and after a home exercise program. *J Phys Ther Sci.* 2007;19:131–7.
- 42 Dursun N, Dursun E, Kiliç Z. Electromyographic biofeedback-controlled exercise versus conservative care for patellofemoral pain syndrome. *Arch Phys Med Rehabil.* 2001;82:1692–5.
- 43 Aghakeshizadeh F, Letafatkar A, Thomas AC. Internal and external focus show similar effect on the gait kinematics in patients with patellofemoral pain: A randomised controlled trial. *Gait Posture.* 2021;84:155–61.
- 44 Bagheri S, Naderi A, Mirali S, *et al.* Adding mindfulness practice to exercise therapy for female recreational runners with patellofemoral pain: a randomized controlled trial. *J Athl Train.* 2021;56:902–11.
- 45 Eng JJ, Pierrynowski MR. Evaluation of soft foot orthotics in the treatment of patellofemoral pain syndrome. *Phys Ther.* 1993;73:62–8; discussion 68-70.
