# Supplementary material for: Are adjunct treatments effective in improving pain and function when added to exercise therapy in people with patellofemoral pain? A systematic review with meta-analysis and appraisal of the quality of interventions
Source: HighWire-hosted journal article supplement (doi:10.1136/bjsports-2024-108145), 2024-06-18
Supplement: bjsports-2024-108145supp009_data_supplement.pdf [file bjsports-2024-108145supp009_data_supplement.pdf]

**Table 1**

Summary of unpooled data.

**1a** Summary of unpooled data for biophysical agents as an adjunct treatment – self-reported pain and function outcomes

| <b>Trial</b>             | <b>Outcome</b>                             | <b>Intervention</b>                                       | <b>Comparator</b>                                              | <b>Short-term</b>                                                                                                | <b>Medium-term</b>                                               | <b>Long-term</b>                                                  |
|--------------------------|--------------------------------------------|-----------------------------------------------------------|----------------------------------------------------------------|------------------------------------------------------------------------------------------------------------------|------------------------------------------------------------------|-------------------------------------------------------------------|
| Qayyum et al.[1] 2022    | Pain (VAS)                                 | High power laser therapy + exercise                       | Exercise                                                       | <u>End of treatment</u><br><u>4<sup>th</sup> week</u><br>Favour high power laser therapy<br>-0.91 [-1.41, -0.40] | –                                                                | –                                                                 |
|                          | Pain (VAS)                                 | High power laser therapy + exercise                       | Exercise                                                       | <u>8<sup>th</sup> week follow-up</u><br>Favour high power laser therapy<br>-1.87 [-2.46, -1.29]                  | –                                                                | –                                                                 |
| Rodrigues et al.[2] 2022 | Pain (VAS)                                 | Anodal transcranial direct current stimulation + exercise | Sham anodal transcranial direct current stimulation + exercise | <u>At the end of the intervention</u><br>No difference<br>-0.03 [-0.77, 0.71]                                    |                                                                  |                                                                   |
| Celik et al.[3] 2020     | Function (AKPS)                            | Neuromuscular electrical stimulation + exercise           | Exercise                                                       | <u>12<sup>th</sup> week follow-up</u><br>No difference<br>-0.19 [-0.95, 0.56]                                    | –                                                                | –                                                                 |
| Glaviano et al.[4] 2019  | Pain (VAS) – current pain in the last week | Patterned electrical neuromuscular stimulation + exercise | Sham patterned electrical neuromuscular stimulation + exercise | <u>End of treatment</u><br><u>4<sup>th</sup> week</u><br>No difference<br>-0.28 [-1.14, 0.58]                    | <u>6-month follow-up</u><br>No difference<br>-0.60 [-1.48, 0.28] | <u>12-month follow-up</u><br>No difference<br>-0.22 [-1.08, 0.64] |
|                          | Pain (VAS) – worst pain in the last week   | Patterned electrical neuromuscular stimulation + exercise | Sham patterned electrical neuromuscular stimulation + exercise | <u>End of treatment</u><br><u>4<sup>th</sup> week</u><br>No difference<br>-0.11 [-0.97, 0.75]                    | <u>6-month follow-up</u><br>No difference<br>-0.71 [-1.60, 0.18] | <u>12-month follow-up</u><br>No difference<br>-0.49 [-1.37, 0.38] |
|                          | Function (AKPS)                            | Patterned electrical neuromuscular stimulation + exercise | Sham patterned electrical neuromuscular stimulation + exercise | <u>End of treatment</u><br><u>4<sup>th</sup> week</u><br>No difference<br>-0.02 [-0.88, 0.83]                    | <u>6-month follow-up</u><br>No difference<br>0.38 [-0.48, 1.25]  | <u>12-month follow-up</u><br>No difference<br>-0.17 [-1.03, 0.69] |

|                      |                                                          |                                        |                       |                                                                                                         |   |                                                                      |
|----------------------|----------------------------------------------------------|----------------------------------------|-----------------------|---------------------------------------------------------------------------------------------------------|---|----------------------------------------------------------------------|
| Nouri et al.[5] 2019 | Pain (VAS)                                               | High-power laser + exercise            | Sham laser + exercise | <u>End of treatment</u><br><u>3<sup>rd</sup> month</u><br>No difference<br>-0.29 [-0.91, 0.34]          |   |                                                                      |
|                      | Function (AKPS)                                          | High-power laser + exercise            | Sham laser + exercise | <u>End of treatment</u><br><u>3<sup>rd</sup> month</u><br>Favours high-power laser<br>0.82 [0.17, 1.47] |   |                                                                      |
| Bily et al.[6] 2008  | Pain (VAS) – average knee pain during last week          | Electric muscle stimulation + exercise | Exercise              | 3 <sup>rd</sup> month<br>No difference<br>-0.29 [-0.95, 0.37]                                           | – | <u>12<sup>th</sup> month</u><br>No difference<br>-0.09 [-0.83, 0.64] |
|                      | Pain (VAS) – knee pain during activities of daily living | Electric muscle stimulation + exercise | Exercise              | <u>3<sup>rd</sup> month</u><br>No difference<br>-0.20 [-0.86, 0.45]                                     | – | <u>12<sup>th</sup> month</u><br>No difference<br>-0.19 [-0.93, 0.54] |
|                      | Pain (VAS) – knee pain during sports                     | Electric muscle stimulation + exercise | Exercise              | <u>3<sup>rd</sup> month</u><br>Favours neuromuscular electrical stimulation<br>-0.91 [-1.60, -0.22]     | – | <u>12<sup>th</sup> month</u><br>No difference<br>0.14 [-0.59, 0.87]  |
|                      | Function (AKPS)                                          | Electric muscle stimulation + exercise | Exercise              | –                                                                                                       | – | <u>12<sup>th</sup> month</u><br>No difference<br>-0.42 [-1.16, 0.32] |

Abbreviations: VAS, visual analogue scale; AKPS, anterior knee pain scale; short-term (<3 months); medium-term (3-12 months); long-term (>12 months).

**1b. Summary of unpooled data for taping as an adjunct treatment – self-reported pain and function outcomes**

| <b>Trial</b>          | <b>Outcome</b>                          | <b>Intervention</b>                  | <b>Comparator</b> | <b>Short-term</b>                                                                                       | <b>Medium-term</b> | <b>Long term</b> |
|-----------------------|-----------------------------------------|--------------------------------------|-------------------|---------------------------------------------------------------------------------------------------------|--------------------|------------------|
| Şahan et al.[7] 2023  | Pain (VAS) – during activity            | Taping + exercise                    | Exercise          | <u>End of treatment</u><br><u>6<sup>th</sup> week</u><br>No difference<br>-0.16 [-0.81, 0.50]           | –                  | –                |
|                       | Pain (VAS) – during buckling sensations | Taping + exercise                    | Exercise          | <u>End of treatment</u><br><u>6<sup>th</sup> week</u><br>No difference<br>0.33 [-0.33, 0.99]            | –                  | –                |
| Songur et al.[8] 2023 | Pain (VAS) – during activity            | McConnell patellar taping + exercise | Exercise          | <u>End of treatment</u><br><u>6<sup>th</sup> week</u><br>No difference<br>0.06 [-0.74, 0.86]            | –                  | –                |
|                       | Pain (VAS) – night time                 | McConnell patellar taping + exercise | Exercise          | <u>End of treatment</u><br><u>6<sup>th</sup> week</u><br>No difference<br>0.07 [-0.73, 0.87]            | –                  | –                |
|                       | Pain (VAS) – at rest                    | Femoral rotation taping + exercise   | Exercise          | <u>End of treatment</u><br><u>6<sup>th</sup> week</u><br>No difference<br>-0.11 [-0.91, 0.69]           | –                  | –                |
|                       | Pain (VAS) – during activity            | Femoral rotation taping + exercise   | Exercise          | <u>End of treatment</u><br><u>6<sup>th</sup> week</u><br>No difference<br>-0.56 [-1.38, 0.26]           | –                  | –                |
|                       | Pain (VAS) – night time                 | Femoral rotation taping + exercise   | Exercise          | <u>End of treatment</u><br><u>6<sup>th</sup> week</u><br>No difference<br>-0.18 [-0.98, 0.63]           | –                  | –                |
| Basbug et al.[9] 2022 | Pain (VAS) – stair descending           | Taping + exercise                    | Exercise          | <u>End of adjunct treatment</u><br><u>6<sup>th</sup> week</u><br>Favours taping<br>-1.20 [-1.99, -0.41] | –                  | –                |
|                       | Pain (VAS) – stair ascending            | Taping + exercise                    | Exercise          | <u>End of treatment</u><br><u>12<sup>th</sup> week</u><br>Favours taping<br>-2.46 [-3.44, -1.48]        | –                  | –                |
|                       |                                         |                                      |                   | <u>End of adjunct treatment</u><br><u>6<sup>th</sup> week</u><br>Favours taping                         | –                  | –                |

|                          |                      |                                                                     |          |                                                                                                  |   |   |
|--------------------------|----------------------|---------------------------------------------------------------------|----------|--------------------------------------------------------------------------------------------------|---|---|
|                          |                      |                                                                     |          | -0.87 [-1.62, -0.11]                                                                             |   |   |
|                          |                      |                                                                     |          | <u>End of treatment</u><br><u>12<sup>th</sup> week</u><br>Favours taping<br>-1.09 [-1.86, -0.31] |   |   |
| Arrebola et al.[10] 2020 | Pain (NPRS) – rest   | Kinesio taping (patellar medialisation) + exercise                  | Exercise | <u>12<sup>th</sup> week follow-up</u><br>No difference<br>-0.34 [-1.54, 0.86]                    | – | – |
|                          | Pain (NPRS) – effort | Kinesio taping (patellar medialisation) + exercise                  | Exercise | <u>End of treatment</u><br><u>12<sup>th</sup> week</u><br>No difference<br>-0.35 [-1.09, 0.39]   |   |   |
|                          |                      |                                                                     |          | <u>12<sup>th</sup> week follow-up</u><br>Favours taping<br>-0.96 [-2.24, -0.33]                  | – | – |
|                          | Pain (NPRS) – rest   | Kinesio taping (lateral rotation of the femur and tibia) + exercise | Exercise | <u>End of treatment</u><br><u>12<sup>th</sup> week</u><br>No difference<br>-0.13 [-0.85, 0.59]   | – | – |
|                          |                      |                                                                     |          | <u>12<sup>th</sup> week follow-up</u><br>Not estimable                                           |   |   |
|                          | Pain (NPRS) – effort | Kinesio taping (lateral rotation of the femur and tibia) + exercise | Exercise | <u>End of treatment</u><br><u>12<sup>th</sup> week</u><br>No difference<br>-0.54 [-1.27, 0.19]   |   |   |
|                          |                      |                                                                     |          | <u>12<sup>th</sup> week follow-up</u><br>Favours taping<br>-0.96 [-2.24, -0.33]                  | – | – |
|                          | Function (AKPS)      | Kinesio taping (patellar medialisation) + exercise                  | Exercise | <u>12<sup>th</sup> week follow-up</u><br>No difference<br>-0.87 [-2.15, 0.40]                    | – | – |
|                          |                      | Kinesio taping (lateral rotation of the femur and                   | Exercise | <u>End of treatment</u><br><u>12<sup>th</sup> week</u><br>No difference<br>-0.01 [-0.73, 0.71]   | – | – |

|                                   |                                      |                             |                                                     |                                                                                   |   |   |
|-----------------------------------|--------------------------------------|-----------------------------|-----------------------------------------------------|-----------------------------------------------------------------------------------|---|---|
|                                   |                                      | tibia) +<br>exercise        |                                                     | 12 <sup>th</sup> week follow-<br>up<br>No difference<br>-0.75 [-2.06; 0.56]       |   |   |
| Günay et<br>al.[11] 2017          | Pain (VAS)                           | Kinesiotaping<br>+ exercise | Exercise and<br>Sham<br>Kinesiotaping<br>+ exercise | 12 <sup>th</sup> week<br>No difference<br>0.22 [-0.40, 0.84]                      | — | — |
|                                   | Functional<br>(AKPS)                 | Kinesiotaping<br>+ exercise | Exercise and<br>Sham<br>Kinesiotaping<br>+ exercise | 12 <sup>th</sup> week<br>No differences<br>0.15 [-0.47, 0.77]                     | — | — |
| Akbaş et<br>al.[12] 2011          | Pain (VAS) –<br>ascending<br>stairs  | Kinesiotaping<br>+ exercise | Exercise                                            | End of treatment<br>6 <sup>th</sup> week<br>No difference<br>0.73 [-0.00, 1.46]   | — | — |
|                                   | Pain (VAS) –<br>descending<br>stairs | Kinesiotaping<br>+ exercise | Exercise                                            | End of treatment<br>6 <sup>th</sup> week<br>No difference<br>0.69 [-0.04, 1.42]   | — | — |
|                                   | Pain (VAS) –<br>Going down<br>hill   | Kinesiotaping<br>+ exercise | Exercise                                            | End of treatment<br>6 <sup>th</sup> week<br>No difference<br>0.60 [-0.13, 1.32]   | — | — |
|                                   | Pain (VAS) –<br>sitting              | Kinesiotaping<br>+ exercise | Exercise                                            | End of treatment<br>6 <sup>th</sup> week<br>Favours exercise<br>0.85 [0.11, 1.59] | — | — |
|                                   | Pain (VAS) –<br>squatting            | Kinesiotaping<br>+ exercise | Exercise                                            | End of treatment<br>6 <sup>th</sup> week<br>No difference<br>0.35 [-0.36, 1.06]   | — | — |
|                                   | Pain (VAS) –<br>standing on<br>knee  | Kinesiotaping<br>+ exercise | Exercise                                            | End of treatment<br>6 <sup>th</sup> week<br>No difference<br>0.13 [-0.58, 0.83]   | — | — |
|                                   | Pain (VAS) –<br>going up hill        | Kinesiotaping<br>+ exercise | Exercise                                            | End of treatment<br>6 <sup>th</sup> week<br>No difference<br>0.25 [-0.45, 0.96]   | — | — |
|                                   | Pain (VAS) –<br>walking              | Kinesiotaping<br>+ exercise | Exercise                                            | End of treatment<br>6 <sup>th</sup> week<br>No difference<br>0.50 [-0.22, 1.21]   | — | — |
| Whittingham<br>et al.[13]<br>2004 | Pain (VAS) –<br>previous 24<br>hours | Taping +<br>exercise        | Exercise                                            | End of treatment<br>4 <sup>th</sup> week<br>Not estimable                         | — | — |

|                       |                                                                    |                   |          |                                                                        |   |                                                                    |
|-----------------------|--------------------------------------------------------------------|-------------------|----------|------------------------------------------------------------------------|---|--------------------------------------------------------------------|
|                       | Pain (VAS) – step test without tape                                | Taping + exercise | Exercise | <u>End of treatment</u><br><u>4<sup>th</sup> week</u><br>Not estimable | – | –                                                                  |
|                       | Pain (VAS) – step test with tape                                   | Taping + exercise | Exercise | <u>End of treatment</u><br><u>4<sup>th</sup> week</u><br>Not estimable | – | –                                                                  |
|                       | Function (FIQ)                                                     | Taping + exercise | Exercise | <u>End of treatment</u><br><u>4<sup>th</sup> week</u><br>Not estimable | – | –                                                                  |
| Clark et al.[14] 2000 | Pain (VAS) – difficulty in climbing stairs and walking on the flat | Taping + exercise | Exercise |                                                                        | – | <u>12 months follow-up</u><br>No difference<br>-0.06 [-0.68, 0.56] |
|                       | Function (WOMAC)                                                   | Taping + exercise | Exercise |                                                                        | – | <u>12 months follow-up</u><br>No difference<br>0.05 [-0.57, 0.67]  |

*Abbreviations:* VAS, visual analogue scale, NPRS, numerical pain rating scale; AKPS, anterior knee pain scale; WOMAC, Western Ontario and McMaster Universities Osteoarthritis Index; FIQ, functional index questionnaire; short-term (<3 months); medium-term (3-12 months); long-term (>12 months)

1c. Summary of unpooled data for whole-body vibration as an adjunct treatment – self-reported pain and function outcomes

| Trial                 | Outcome         | Intervention                    | Comparator | Short-term                                                                              | Medium-term | Long term |
|-----------------------|-----------------|---------------------------------|------------|-----------------------------------------------------------------------------------------|-------------|-----------|
| Corum et al.[15] 2018 | Pain (VAS)      | Whole body vibration + exercise | Exercise   | 6 <sup>th</sup> month follow-up<br>No difference<br>-0.58 [-1.27, 0.11]                 | —           | —         |
|                       | Function (AKPS) | Whole body vibration + exercise | Exercise   | 6 <sup>th</sup> month follow-up<br>Favours whole body vibration<br>-1.06 [-1.79, -0.34] | —           | —         |

Abbreviations: VAS, visual analogue scale, AKPS, anterior knee pain scale; short-term (<3 months); medium-term (3-12 months); long-term (>12 months).

1d. Summary of unpooled data for dry needling as an adjunct treatment – self-reported pain and function outcomes

| Trial                 | Outcome                                                        | Intervention            | Comparator               | Short-term                                                                                                          | Medium-term | Long term |
|-----------------------|----------------------------------------------------------------|-------------------------|--------------------------|---------------------------------------------------------------------------------------------------------------------|-------------|-----------|
| Ma et al.[16] 2020    | Pain (VAS)                                                     | Dry needling + exercise | Sham needling + exercise | <u>End of treatment</u><br><u>6<sup>th</sup> week</u><br>Favours dry needling<br>-1.67 [-2.33, -1.00]               | —           | —         |
|                       |                                                                |                         |                          | <u>3<sup>rd</sup> month follow-up</u><br>Favours dry needling<br>-2.18 [-2.91, -1.45]                               |             |           |
|                       | Function (AKPS)                                                | Dry needling + exercise | Sham needling + exercise | <u>End of treatment</u><br><u>6<sup>th</sup> week</u><br>Favours dry needling<br>-1.67 [-2.34, -1.01]               | —           | —         |
|                       |                                                                |                         |                          | <u>3<sup>rd</sup> month follow-up</u><br>Favours dry needling<br>-2.20 [-2.93, -1.47]                               |             |           |
| Zarei et al.[17] 2020 | Pain (NPRS) – average knee pain intensity in the previous week | Dry needling + exercise | Exercise                 | <u>4<sup>th</sup> week (post-treatment)</u><br>Favours dry needling<br>-1.93 [-2.69, -1.17]                         | —           | —         |
|                       |                                                                |                         |                          | <u>6<sup>th</sup> week after the start of treatment (follow-up)</u><br>Favours dry needling<br>-2.18 [-2.98, -1.39] |             |           |
|                       | Function (AKPS)                                                | Dry needling + exercise | Exercise                 | <u>End of treatment</u><br><u>4<sup>th</sup> week</u><br>Favours dry needling<br>-1.36 [-2.05, -0.66]               | —           | —         |
|                       |                                                                |                         |                          |                                                                                                                     |             |           |



|                            |                            |                            |                                |                                                                                                                            |   |   |
|----------------------------|----------------------------|----------------------------|--------------------------------|----------------------------------------------------------------------------------------------------------------------------|---|---|
|                            |                            |                            |                                | 6 <sup>th</sup> week after the<br>start of treatment<br>(follow-up)<br>Favours dry<br>needling<br>-2.10 [-2.89, -<br>1.31] |   |   |
| Sutlive et<br>al.[18] 2018 | Pain (NPRS)<br>– step up   | Dry needling +<br>exercise | Sham<br>needling +<br>exercise | 72 hours<br>No difference<br>0.00 [-0.51, 0.51]                                                                            | – | – |
|                            | Pain (NPRS)<br>– step down | Dry needling +<br>exercise | Sham<br>needling +<br>exercise | 72 hours<br>No difference<br>0.31 [-0.20, 0.83]                                                                            | – | – |
|                            | Pain (NPRS)<br>– squat     | Dry needling +<br>exercise | Sham<br>needling +<br>exercise | 72 hours<br>No difference<br>0.30 [-0.21, 0.82]                                                                            | – | – |
|                            | Function<br>(AKPS)         | Dry needling +<br>exercise | Sham<br>needling +<br>exercise | 72 hours<br>No difference<br>-0.52 [-1.04, 0.00]                                                                           | – | – |

Abbreviations: VAS, visual analogue scale, NPRS, numerical pain rating scale; AKPS, anterior knee pain scale; short-term (<3 months); medium-term (3-12 months); long-term (>12 months).

1e. Summary of unpooled data for knee brace as an adjunct treatment – self-reported pain and function outcomes

| Trial               | Outcome                                                        | Intervention                | Comparator | Short-term                                                          | Medium-term | Long term |
|---------------------|----------------------------------------------------------------|-----------------------------|------------|---------------------------------------------------------------------|-------------|-----------|
| Lun et al.[19] 2005 | Pain (VAS) – during sport activity                             | Patellar bracing + exercise | Exercise   | <u>12<sup>th</sup> week</u><br>No difference<br>-0.08 [-0.56, 0.41] | –           | –         |
|                     | Pain (VAS) – 1 hour after sport activity                       | Patellar bracing + exercise | Exercise   | <u>12<sup>th</sup> week</u><br>No difference<br>0.47 [-0.02, 0.96]  | –           | –         |
|                     | Pain (VAS) – following 30 minutes of sitting with knees flexed | Patellar bracing + exercise | Exercise   | <u>12<sup>th</sup> week</u><br>No difference<br>0.08 [-0.41, 0.56]  | –           | –         |

Abbreviations: VAS, visual analogue scale, KFS, knee function scale; short-term (<3 months); medium-term (3-12 months); long-term (>12 months).

1f. Summary of unpooled data for manual therapy as an adjunct treatment – self-reported pain and function outcomes

| Trial                   | Outcome         | Intervention                         | Comparator | Short-term                                                                                                         | Medium-term | Long term |
|-------------------------|-----------------|--------------------------------------|------------|--------------------------------------------------------------------------------------------------------------------|-------------|-----------|
| Fatimah et[20] al. 2021 | Pain (NPRS)     | Tibiofemoral mobilisation + exercise | Exercise   | <u>End of treatment</u><br><u>4<sup>th</sup> week</u><br>Favours tibiofemoral mobilisation<br>-0.63 [-1.19, -0.07] | —           | —         |
|                         | Function (AKPS) | Tibiofemoral mobilisation + exercise | Exercise   | <u>End of treatment</u><br><u>4<sup>th</sup> week</u><br>Favours tibiofemoral mobilisation<br>-0.70 [-1.27, -0.14] | —           | —         |
| Telles et al.[21] 2016  | Pain (NPRS)     | Myofascial technique + exercise      | Exercise   | <u>End of treatment</u><br><u>5<sup>th</sup> week</u><br>No difference<br>-0.66 [-1.61, 0.30]                      | —           | —         |
|                         | Function (LEFS) | Myofascial technique + exercise      | Exercise   | <u>End of treatment</u><br><u>5<sup>th</sup> week</u><br>No difference<br>-0.48 [-1.42, 0.46]                      | —           | —         |

Abbreviations: NPRS, numerical pain rating scale; AKPS, anterior knee pain scale; LEFS, Lower Extremity Functional Scale; short-term (<3 months); medium-term (3-12 months); long-term (>12 months).

**1g.** Summary of unpooled data for blood flow restriction as an adjunct treatment – self-reported pain and function outcomes

| Trial                    | Outcome                                                  | Intervention                            | Comparator                                      | Short-term                                                                            | Medium-term                                                                   | Long term |
|--------------------------|----------------------------------------------------------|-----------------------------------------|-------------------------------------------------|---------------------------------------------------------------------------------------|-------------------------------------------------------------------------------|-----------|
| Giles et al.[22]<br>2017 | Pain (VAS)<br>– worst pain<br>in the past<br>week        | Blood flow<br>restriction +<br>exercise | Sham blood<br>flow<br>restriction +<br>exercise | <u>End of treatment</u><br><u>8th week</u><br>No difference<br>-0.08 [-0.52,<br>0.36] | <u>6 months</u><br><u>follow-up</u><br>No difference<br>0.09 [-0.35,<br>0.53] | -         |
|                          | Pain (VAS)<br>– with ADL<br>(stair, squat<br>or sitting) | Blood flow<br>restriction +<br>exercise | Sham blood<br>flow<br>restriction +<br>exercise | <u>End of treatment</u><br><u>8th week</u><br>No difference<br>-0.08 [-0.52,<br>0.36] | <u>6 months</u><br><u>follow-up</u><br>No difference<br>0.30 [-0.15,<br>0.74] | -         |
|                          | Function<br>(AKPS)                                       | Blood flow<br>restriction +<br>exercise | Sham blood<br>flow<br>restriction +<br>exercise | <u>End of treatment</u><br><u>8th week</u><br>No difference<br>-0.04 [-0.48,<br>0.40] | <u>6 months</u><br><u>follow-up</u><br>No difference<br>0.12 [-0.32,<br>0.56] | -         |

*Abbreviation:* VAS, visual analogue scale; ADL, activity of daily living; AKPS, anterior knee pain scale; *short-term* (<3 months); *medium-term* (3-12 months); *long-term* (>12 months).

1h. Summary of unpooled data for EMG biofeedback as an adjunct treatment – self-reported pain and function outcomes

| Trial                  | Outcome                                                             | Intervention               | Comparator | Short-term                                                           | Medium-term | Long term |   |   |
|------------------------|---------------------------------------------------------------------|----------------------------|------------|----------------------------------------------------------------------|-------------|-----------|---|---|
| Dursun et al.[23] 2001 | Pain (VAS) – greatest level of knee discomfort during the last week | EMG biofeedback + exercise | Exercise   | <u>2<sup>nd</sup> month</u><br>No difference<br>0.13 [-0.38, 0.64]   | -           | -         |   |   |
|                        |                                                                     |                            |            | <u>3<sup>rd</sup> month</u><br>Favours exercise<br>0.56 [0.04, 1.07] |             |           |   |   |
|                        |                                                                     |                            |            |                                                                      |             |           |   |   |
|                        | Function (FIQ)                                                      |                            |            | <u>1<sup>st</sup> month</u><br>No difference<br>-0.43 [-0.94, 0.09]  |             |           |   |   |
|                        |                                                                     |                            |            | <u>2<sup>nd</sup> month</u><br>No difference<br>-0.50 [-1.02, 0.01,] |             |           | - | - |
|                        |                                                                     |                            |            | <u>3<sup>rd</sup> month</u><br>No difference<br>-0.08 [-0.58, 0.43]  |             |           |   |   |

Abbreviations: EMG, electromyographic, VAS, visual analogue scale, FIQ, functional index questionnaire; short-term (<3 months); medium-term (3-12 months); long-term (>12 months).

1i. Summary of unpooled data for internal and external attentional focus as an adjunct treatment – self-reported pain and function outcomes

| Trial                          | Outcome         | Intervention              | Comparator | Short-term                                                                                    | Medium-term | Long term |
|--------------------------------|-----------------|---------------------------|------------|-----------------------------------------------------------------------------------------------|-------------|-----------|
| Aghakeshizadeh et al.[24] 2021 | Pain (VAS)      | Internal focus + exercise | Exercise   | End of treatment<br>6 <sup>th</sup> week<br>Favours internal focus<br>-1.39 [-2.01, -0.77]    | -           | -         |
|                                | Pain (VAS)      | External focus + exercise | Exercise   | End of treatment<br>6 <sup>th</sup> week<br>Favours to external focus<br>-2.43 [-3.17, -1.68] | -           | -         |
|                                | Function (AKPS) | Internal focus + exercise | Exercise   | End of treatment<br>6 <sup>th</sup> week<br>Favours internal focus<br>-0.68 [-1.25, -0.11]    | -           | -         |
|                                | Function (AKPS) | External focus + exercise | Exercise   | End of treatment<br>6 <sup>th</sup> week<br>Favours to external focus<br>-1.50 [-2.14, -0.87] | -           | -         |

Abbreviations: VAS, visual analogue scale; AKPS, anterior knee pain scale; short-term (<3 months); medium-term (3-12 months); long-term (>12 months).

1j. Summary of unpooled data for mindfulness as an adjunct treatment – self-reported pain and function outcomes

| Trial                   | Outcome                      | Intervention           | Comparator | Short-term                                                                                             | Medium-term | Long term |
|-------------------------|------------------------------|------------------------|------------|--------------------------------------------------------------------------------------------------------|-------------|-----------|
| Bagheri et al.[25] 2021 | Pain (VAS) – usual pain      | Mindfulness + exercise | Exercise   | <u>9<sup>th</sup> week</u><br>No difference<br>-0.17 [-0.90, 0.56]                                     |             |           |
|                         |                              |                        |            | <u>18<sup>th</sup> week</u><br>No difference<br>-0.78 [-1.54, -0.02]                                   | -           | -         |
|                         |                              |                        |            | <u>2<sup>nd</sup> month</u><br>No difference<br>-1.08 [-1.87, -0.29]                                   |             |           |
|                         | Pain (VAS) – during running  | Mindfulness + exercise | Exercise   | <u>9<sup>th</sup> week</u><br>No difference<br>-0.37 [-1.11, 0.37]                                     |             |           |
|                         |                              |                        |            | <u>18<sup>th</sup> week</u><br>No difference<br>-0.63 [-1.38, 0.11]                                    | -           | -         |
|                         |                              |                        |            | <u>2<sup>nd</sup> month</u><br>No difference<br>-0.65 [-1.40, 0.10]                                    |             |           |
|                         | Pain (VAS) – during stepping | Mindfulness + exercise | Exercise   | <u>9<sup>th</sup> week</u><br>No difference<br>-0.57 [-1.31, 0.18]                                     |             |           |
|                         |                              |                        |            | <u>End of exercise program</u><br><u>18<sup>th</sup> week</u><br>No difference<br>-0.73 [-1.49, 0.03]  | -           | -         |
|                         |                              |                        |            | <u>2-month follow-up</u><br>No difference<br>-0.75 [-1.51, 0.01]                                       |             |           |
|                         | Function (KOS)               | Mindfulness + exercise | Exercise   | <u>9<sup>th</sup> week</u><br>No difference<br>0.57 [-0.18, 1.31]                                      |             |           |
|                         |                              |                        |            | <u>End of exercise program</u><br><u>18<sup>th</sup> week</u><br>Favours control<br>0.73 [-0.03, 1.49] | -           | -         |
|                         |                              |                        |            | <u>2-month follow-up</u><br>No difference                                                              |             |           |

0.75 [-0.02, 1.52]

Abbreviation: VAS, visual analogue scale; KOS, Knee outcome survey; short-term (<3 months); medium-term (3-12 months); long-term (>12 months).

Studies ineligible for pooling

Of the 20 trials ineligible to pool, various interventions were assessed, including taping,[9,13,26] dry needling,[16–18] blood flow restriction,[22,27] knee brace,[28] manual therapy,[20,21,29] internal and external attentional focus,[24] mindfulness,[25] foot orthoses,[30] and biophysical agents.[1,2,4,5,31] All trials examining taping, knee brace, internal and external attentional focus, mindfulness, and foot orthoses combined with exercise therapy showed symptom improvement in the short term when compared to exercise therapy alone. Conversely, results for dry needling, manual therapy, and blood flow restrictions are conflicting. Regarding biophysical agents, it was observed that higher power laser combined with exercise therapy and pulsed electromagnetic fields combined with exercise therapy led to pain reduction in the short-term when compared to exercise therapy alone.

References

1 Qayyum HA, Arsalan SA, Tanveer F, *et al.* Role of high power laser therapy on pain reduction in patients with patellofemoral pain syndrome. *Pak J Med Health Sci.* 2022;16:9–12.

2 Rodrigues GM, Paixão A, Arruda T, *et al.* Anodal transcranial direct current stimulation increases muscular strength and reduces pain perception in women with patellofemoral pain. *J Strength Cond Res.* 2022;36:371–8.



- 3 Celik D, Argut SK, Türker N, *et al.* The effectiveness of superimposed neuromuscular electrical stimulation combined with strengthening exercises on patellofemoral pain: A randomized controlled pilot trial. *J Back Musculoskelet Rehabil.* 2020;33:693–9.
- 4 Glaviano NR, Marshall AN, Mangum LC, *et al.* Impairment-based rehabilitation with patterned electrical neuromuscular stimulation and lower extremity function in individuals with patellofemoral pain: a preliminary study. *J Athl Train.* 2019;54:255–69.
- 5 Nouri F, Raeissadat SA, Eliaspour D, *et al.* Efficacy of high-power laser in alleviating pain and improving function of patients with patellofemoral pain syndrome: a single-blind randomized controlled trial. *J Lasers Med Sci.* 2019;10:37–43.
- 6 Bily W, Trimmel L, Mödlin M, *et al.* Training program and additional electric muscle stimulation for patellofemoral pain syndrome: a pilot study. *Arch Phys Med Rehabil.* 2008;89:1230–6.
- 7 Şahan TY, Vergili Ö, Oktaş B. Investigation of new application technique named star taping in patellofemoral pain: a randomized, single-blind, and placebo-controlled study. *Somatosens Mot Res.* 2023;1–8.
- 8 Songur A, Demirdel E, Kılıc O, *et al.* The effects of different taping methods on patellofemoral alignment, pain and function in individuals with patellofemoral pain: A randomized controlled trial. *PM R.* Published Online First: 29 August 2023. doi: 10.1002/pmrj.13067.
- 9 Basbug P, Kilic RT, Atay AO, *et al.* The effects of progressive neuromuscular exercise program and taping on muscle strength and pain in patellofemoral pain. A randomized controlled blind study. *Somatosens Mot Res.* 2022;39:39–45.
- 10 Arrebola LS, Teixeira de Carvalho R, Lam Wun PY, *et al.* Investigation of different application techniques for Kinesio Taping® with an accompanying exercise protocol

- for improvement of pain and functionality in patients with patellofemoral pain syndrome: A pilot study. *J Bodyw Mov Ther.* 2020;24:47–55.
- 11 Günay E, Sarıkaya S, Özdolap Ş, *et al.* Effectiveness of the kinesiotaping in the patellofemoral pain syndrome. *Turk J Phys Med Rehabil.* 2017;63:299–306.
  - 12 Akbaş E, Atay AO, Yüksel I. The effects of additional kinesio taping over exercise in the treatment of patellofemoral pain syndrome. *Acta Orthop Traumatol Turc.* 2011;45:335–41.
  - 13 Whittingham M, Palmer S, Macmillan F. Effects of taping on pain and function in patellofemoral pain syndrome: a randomized controlled trial. *J Orthop Sports Phys Ther.* 2004;34:504–10.
  - 14 Clark DI, Downing N, Mitchell J, *et al.* Physiotherapy for anterior knee pain: a randomised controlled trial. *Ann Rheum Dis.* 2000;59:700–4.
  - 15 Corum M, Basoglu C, Yakal S, *et al.* Effects of whole body vibration training on isokinetic muscular performance, pain, function, and quality of life in female patients with patellofemoral pain: a randomized controlled trial. *J Musculoskelet Neuronal Interact.* 2018;18:473–84.
  - 16 Ma Y-T, Li L-H, Han Q, *et al.* Effects of trigger point dry needling on neuromuscular performance and pain of individuals affected by patellofemoral pain: a randomized controlled trial. *J Pain Res.* 2020;13:1677–86.
  - 17 Zarei H, Bervis S, Piroozi S, *et al.* Added value of gluteus medius and quadratus lumborum dry needling in improving knee pain and function in female athletes with patellofemoral pain syndrome: a randomized clinical trial. *Arch Phys Med Rehabil.* 2020;101:265–74.

- 18 Sutlive TG, Golden A, King K, *et al.* Short-term effects of trigger point dry needling on pain and disability in subjects with patellofemoral pain syndrome. *Int J Sports Phys Ther.* 2018;13:462–73.
- 19 Lun VMY, Wiley JP, Meeuwisse WH, *et al.* Effectiveness of patellar bracing for treatment of patellofemoral pain syndrome. *Clin J Sport Med.* 2005;15:235–40.
- 20 Fatimah I, Waqqar S. Effects of tibiofemoral mobilization in patients of Patellofemoral pain syndrome. *JPMA J Pak Med Assoc.* 2021;71:2506–10.
- 21 Telles G, Cristovão DR, Belache FATC, *et al.* The effect of adding myofascial techniques to an exercise programme for patients with anterior knee pain. *J Bodyw Mov Ther.* 2016;20:844–50.
- 22 Giles L, Webster KE, McClelland J, *et al.* Quadriceps strengthening with and without blood flow restriction in the treatment of patellofemoral pain: a double-blind randomised trial. *Br J Sports Med.* 2017;51:1688–94.
- 23 Dursun N, Dursun E, Kiliç Z. Electromyographic biofeedback-controlled exercise versus conservative care for patellofemoral pain syndrome. *Arch Phys Med Rehabil.* 2001;82:1692–5.
- 24 Aghakeshizadeh F, Letafatkar A, Thomas AC. Internal and external focus show similar effect on the gait kinematics in patients with patellofemoral pain: A randomised controlled trial. *Gait Posture.* 2021;84:155–61.
- 25 Bagheri S, Naderi A, Mirali S, *et al.* Adding mindfulness practice to exercise therapy for female recreational runners with patellofemoral pain: a randomized controlled trial. *J Athl Train.* 2021;56:902–11.
- 26 Mousavi SM, Khayambashi K, Nejadian SL, *et al.* The Effects of Kinesiotape and Strength Training on Knee Pain and Quadriceps Strength in People with Patellofemoral Pain Syndrome (PFPS). *J Isfahan Med Sch.* 2011;29:1657–68.

- 27 Constantinou A, Mamais I, Papathanasiou G, *et al.* Comparing hip and knee focused exercises versus hip and knee focused exercises with the use of blood flow restriction training in adults with patellofemoral pain. *Eur J Phys Rehabil Med.* 2022;58:225–35.
- 28 Petersen W, Ellermann A, Rembitzki IV, *et al.* Evaluating the potential synergistic benefit of a realignment brace on patients receiving exercise therapy for patellofemoral pain syndrome: a randomized clinical trial. *Arch Orthop Trauma Surg.* 2016;136:975–82.
- 29 Anwar S, Javaid M, Malik S, *et al.* Effects of mulligan pain release phenomenon technique in management of patellofemoral pain syndrome: RCT. *Pak J Med Health Sci.* 2022;16:72–72. doi: 10.53350/pjmhs2216372.
- 30 Eng JJ, Pierrynowski MR. Evaluation of soft foot orthotics in the treatment of patellofemoral pain syndrome. *Phys Ther.* 1993;73:62–8; discussion 68–70.
- 31 Iammarrone CS, Cadossi M, Sambri A, *et al.* Is there a role of pulsed electromagnetic fields in management of patellofemoral pain syndrome? Randomized controlled study at one year follow-up. *Bioelectromagnetics.* 2016;37:81–8.
